# Supplementary material
Source: publisher figshare collection journal article supplement (https://gsajournals.figshare.com/ndownloader/files/32118710)
Supplement: Supplementary file 1 [file 32118710]

## Sheet: Table S2a
The blood cis-mQTLs detected in discovery cohort with 238 pediatric samples
snps	gene	beta	stat	pvalue	DNAm_per_allele
rs10796127	cg26708920	0.34	47.55	2.31e-119	0.39
rs9418691	cg06406458	-0.35	-46.96	3.06e-118	0.33
rs807019	cg02932204	0.28	45.1	1.15e-114	0.283
rs76805118	cg23771949	-0.18	-41.19	9.03e-107	0.194
rs3923974	cg23771949	-0.18	-39.75	1.03e-103	0.187
rs7098749	cg23771949	-0.18	-39.47	4.18e-103	0.186
rs7087640	cg01780345	0.27	39.44	4.82e-103	0.294
rs11812218	cg20673407	-0.38	-39.37	7.06e-103	0.391
rs1330865	cg01780345	0.27	38.55	4.25e-101	0.3
rs4746915	cg17477052	0.12	38.41	8.6e-101	0.129
rs4746916	cg17477052	0.12	38.41	8.5e-101	0.129
rs10882763	cg00905457	-0.34	-37.81	1.85e-99	0.332
rs12766391	cg09533556	0.25	37.46	1.17e-98	0.285
rs8181376	cg26708920	0.34	36.77	4.18e-97	0.387
rs7080527	cg17477052	0.12	36.67	7.22e-97	0.126
rs55712186	cg23771949	-0.18	-36.33	4.27e-96	0.186
rs12217895	cg05119883	0.24	36.17	9.93e-96	0.247
rs61331747	cg05119883	0.24	36.17	9.93e-96	0.247
rs10887024	cg07444487	0.19	35.96	2.97e-95	0.192
rs7895680	cg01780345	0.26	35.94	3.46e-95	0.294
rs1249348	cg09294573	0.27	35.57	2.41e-94	0.306
rs915209	cg09294573	0.27	35.49	3.71e-94	0.304
rs1273097	cg09294573	0.27	35.49	3.71e-94	0.304
rs1148179	cg09294573	0.27	35.49	3.71e-94	0.304
rs1148178	cg09294573	0.27	35.13	2.63e-93	0.302
rs56678407	cg23771949	-0.18	-34.98	5.99e-93	0.191
rs10995271	cg09533556	0.24	34.81	1.5e-92	0.276
rs1148181	cg09294573	0.27	34.79	1.63e-92	0.303
rs10822050	cg09533556	0.24	34.63	4.1e-92	0.274
rs9418691	cg19572051	-0.23	-34.48	9.13e-92	0.213
rs1148180	cg09294573	0.27	34.44	1.11e-91	0.302
rs10786791	cg01780345	0.26	34.4	1.42e-91	0.297
rs11008222	cg20673407	-0.37	-34.29	2.61e-91	0.384
rs10870273	cg16106427	0.31	34.13	6.15e-91	0.301
rs138012443	cg09533556	0.24	34.03	1.08e-90	0.277
rs10826864	cg20673407	-0.38	-33.93	1.87e-90	0.385
rs2864011	cg01780345	0.26	33.91	2.09e-90	0.292
rs7090409	cg23771949	-0.18	-33.74	5.35e-90	0.19
rs11812238	cg20673407	-0.37	-33.44	3e-89	0.376
rs4880351	cg16106427	0.32	33.29	6.72e-89	0.301
rs11816061	cg14418922	-0.2	-33.28	7.22e-89	0.199
rs34449737	cg14418922	-0.2	-33.28	7.22e-89	0.199
rs11008223	cg20673407	-0.38	-33.22	1.04e-88	0.383
rs200753700	cg09533556	0.24	32.86	7.54e-88	0.275
rs10884000	cg01780345	0.25	32.51	5.75e-87	0.284
rs2379235	cg16106427	0.31	32.45	7.84e-87	0.296
rs1148182	cg09294573	0.27	32.45	8.13e-87	0.301
rs10870273	cg01458105	0.27	32.44	8.45e-87	0.256
rs11812207	cg20673407	-0.38	-32.28	2.16e-86	0.385
rs55978514	cg05119883	0.23	32.04	8.44e-86	0.243
rs2807742	cg11671940	0.23	31.71	5.71e-85	0.233
rs4880351	cg01458105	0.27	31.67	7.28e-85	0.256
rs12768910	cg20673407	-0.37	-31.67	7.32e-85	0.372
rs4880351	cg25969878	0.14	31.66	7.4e-85	0.135
rs4880353	cg16106427	0.3	31.48	2.21e-84	0.294
rs9664407	cg25969878	0.14	31.37	4e-84	0.132
rs9664407	cg16106427	0.31	30.97	4.29e-83	0.292
rs9645570	cg01780345	0.25	30.6	3.76e-82	0.282
rs10870273	cg25969878	0.14	30.59	4.1e-82	0.134
rs1148177	cg09294573	0.26	30.49	7.56e-82	0.303
rs4929820	cg24443494	0.19	30.48	7.91e-82	0.196
rs2379235	cg01458105	0.26	30.44	9.76e-82	0.253
rs11193149	cg24795173	0.29	30.24	3.29e-81	0.313
rs11193150	cg24795173	0.29	30.24	3.29e-81	0.313
rs11193153	cg24795173	0.29	30.24	3.29e-81	0.313
rs9664407	cg01458105	0.26	30.13	6.2e-81	0.249
rs1249347	cg09294573	0.26	30.06	9.84e-81	0.294
rs2447629	cg09294573	0.26	30.06	9.84e-81	0.294
rs10870273	cg19754622	0.27	30.05	1.02e-80	0.263
rs2379235	cg25969878	0.13	29.93	2.15e-80	0.132
rs7097132	cg20673407	-0.36	-29.88	2.83e-80	0.371
rs7097925	cg01780345	-0.25	-29.8	4.66e-80	0.281
rs7901480	cg17371064	-0.21	-29.78	5.19e-80	0.238
rs615172	cg13473803	-0.16	-29.73	7.17e-80	0.162
rs4880353	cg01458105	0.26	29.72	7.25e-80	0.251
rs1148185	cg09294573	0.26	29.63	1.27e-79	0.293
rs3936165	cg24443494	0.2	29.6	1.49e-79	0.202
rs7082919	cg01780345	0.25	29.36	6.66e-79	0.284
rs1148183	cg09294573	0.26	29.35	7.16e-79	0.293
rs11200264	cg07444487	0.18	29.34	7.43e-79	0.184
rs4880353	cg25969878	0.13	29.33	7.93e-79	0.131
rs7901618	cg17371064	-0.21	-29.12	2.88e-78	0.24
rs10795035	cg17371064	-0.21	-29.12	2.88e-78	0.24
rs12247234	cg24795173	0.29	29.05	4.25e-78	0.311
rs12268682	cg24795173	0.29	28.99	6.3e-78	0.317
rs7094595	cg09533556	0.25	28.82	1.76e-77	0.272
rs12266740	cg24795173	0.29	28.79	2.1e-77	0.32
rs12245102	cg24795173	0.29	28.79	2.1e-77	0.32
rs7905030	cg09533556	0.25	28.67	4.44e-77	0.274
rs7090073	cg09533556	0.25	28.67	4.44e-77	0.274
rs10995258	cg09533556	0.24	28.65	5e-77	0.27
rs7901595	cg24443494	0.19	28.57	8.38e-77	0.196
rs4880352	cg01458105	0.25	28.57	8.54e-77	0.227
rs2379235	cg19754622	0.26	28.53	1.08e-76	0.259
rs10995255	cg09533556	0.24	28.52	1.15e-76	0.271
rs10995256	cg09533556	0.24	28.52	1.15e-76	0.271
rs12768538	cg09533556	0.24	28.52	1.15e-76	0.271
rs1148186	cg09294573	0.26	28.51	1.22e-76	0.287
rs4880351	cg19754622	0.27	28.36	3.15e-76	0.261
rs4880353	cg19754622	0.26	28.22	7.43e-76	0.257
rs1763406	cg07158320	-0.25	-28.14	1.23e-75	0.255
rs2783613	cg07158320	-0.25	-28.14	1.23e-75	0.255
rs2783612	cg07158320	-0.25	-28.14	1.23e-75	0.255
rs10795040	cg17371064	-0.21	-28.01	2.75e-75	0.238
rs10904033	cg17371064	-0.21	-28.01	2.75e-75	0.238
rs4147144	cg17371064	-0.21	-28.01	2.75e-75	0.238
rs2783611	cg07158320	-0.25	-27.97	3.57e-75	0.255
rs7900144	cg25423573	0.15	27.96	3.79e-75	0.163
rs813081	cg09294573	0.26	27.84	7.7e-75	0.296
rs10995260	cg09533556	0.24	27.82	8.93e-75	0.269
rs11193152	cg24795173	0.29	27.81	9.44e-75	0.321
rs12268817	cg24795173	0.29	27.71	1.75e-74	0.31
rs11146339	cg23771949	-0.16	-27.7	1.92e-74	0.172
rs11002957	cg25423573	0.15	27.64	2.75e-74	0.161
rs10857489	cg02562448	0.14	27.62	3.17e-74	0.136
rs6480936	cg25423573	0.15	27.58	3.96e-74	0.161
rs4929793	cg24443494	0.2	27.52	6.08e-74	0.198
rs7915508	cg24443494	0.2	27.52	6.08e-74	0.198
rs28612146	cg24443494	0.2	27.52	6.08e-74	0.198
rs672785	cg24877975	0.18	27.49	7.31e-74	0.196
rs10824749	cg25423573	0.15	27.32	2.16e-73	0.161
rs2475433	cg13473803	-0.16	-27.24	3.44e-73	0.162
rs7095264	cg24795173	0.29	27.23	3.77e-73	0.308
rs4929794	cg24443494	0.2	27.01	1.46e-72	0.199
rs584353	cg24877975	0.18	26.97	1.96e-72	0.198
rs630051	cg24877975	0.18	26.96	2.07e-72	0.197
rs666429	cg24877975	0.18	26.85	4.16e-72	0.199
rs1903890	cg24877975	0.18	26.79	5.99e-72	0.201
rs2616637	cg24877975	0.18	26.78	6.44e-72	0.2
rs2770202	cg14240646	0.25	26.77	6.94e-72	0.25
rs10995242	cg09533556	0.23	26.73	8.79e-72	0.27
rs10995243	cg09533556	0.23	26.73	8.95e-72	0.269
rs10995246	cg09533556	0.23	26.73	8.95e-72	0.269
rs149499422	cg02562448	0.14	26.72	9.53e-72	0.135
rs140733555	cg02562448	0.14	26.72	9.53e-72	0.135
rs10995249	cg09533556	0.23	26.7	1.1e-71	0.266
rs10995250	cg09533556	0.23	26.7	1.1e-71	0.266
rs1977292	cg02562448	0.14	26.69	1.13e-71	0.136
rs138963527	cg02562448	0.14	26.68	1.28e-71	0.135
rs56237213	cg02562448	0.14	26.68	1.28e-71	0.135
rs1946391	cg14812524	0.16	26.62	1.82e-71	0.152
rs7092993	cg17371064	-0.22	-26.58	2.34e-71	0.24
rs10995251	cg09533556	0.23	26.53	3.23e-71	0.266
rs10995241	cg09533556	0.23	26.53	3.3e-71	0.27
rs10995248	cg09533556	0.23	26.49	4.19e-71	0.267
rs16917546	cg09533556	0.23	26.49	4.19e-71	0.267
rs2807740	cg11671940	0.22	26.42	6.45e-71	0.227
rs28379249	cg24443494	0.2	26.42	6.67e-71	0.197
rs557264	cg27001894	-0.16	-26.34	1.14e-70	0.171
rs10995238	cg09533556	0.23	26.26	1.82e-70	0.271
rs7474813	cg09533556	0.23	26.26	1.82e-70	0.271
rs606682	cg24877975	0.18	26.23	2.31e-70	0.199
rs2616636	cg24877975	0.18	26.22	2.35e-70	0.2
rs945797	cg17371064	-0.21	-26.21	2.64e-70	0.233
rs7920264	cg01458105	0.26	26.2	2.81e-70	0.24
rs2807738	cg11671940	0.22	26.14	4.05e-70	0.229
rs7076074	cg24443494	0.2	26.14	4.11e-70	0.196
rs5030904	cg14418922	-0.2	-26.14	4.17e-70	0.193
rs1077203	cg02562448	0.14	26.07	6.35e-70	0.135
rs10995239	cg09533556	0.23	26.06	6.69e-70	0.272
rs4360590	cg09533556	0.23	26.06	6.69e-70	0.272
rs2780672	cg14240646	0.25	26.02	8.92e-70	0.246
rs2800392	cg14240646	0.25	26.02	8.92e-70	0.246
rs11193151	cg24795173	0.29	26.01	9.34e-70	0.314
rs2040038;rs201820012	cg14240646	0.25	25.98	1.12e-69	0.245
rs1148167	cg14240646	0.25	25.85	2.67e-69	0.252
rs1144511	cg14240646	0.25	25.82	3.2e-69	0.253
rs7905456	cg20673407	-0.36	-25.8	3.68e-69	0.364
rs2447633	cg24877975	0.18	25.79	3.88e-69	0.201
rs998334	cg24877975	0.18	25.79	3.88e-69	0.201
rs4838515	cg02562448	0.14	25.78	4.13e-69	0.133
rs10857487	cg02562448	0.14	25.76	4.94e-69	0.132
rs11596444	cg02562448	0.14	25.76	4.94e-69	0.132
rs10857488	cg02562448	0.14	25.76	4.94e-69	0.132
rs4838389	cg02562448	0.14	25.76	4.94e-69	0.132
rs57276577	cg02562448	0.14	25.76	4.94e-69	0.132
rs10829212	cg14240646	0.25	25.67	8.39e-69	0.247
rs2780674	cg14240646	0.25	25.64	1.07e-68	0.248
rs9664407	cg19754622	0.26	25.49	2.75e-68	0.25
rs9418773	cg06406458	-0.35	-25.41	4.63e-68	0.326
rs9418694	cg06406458	-0.35	-25.41	4.63e-68	0.326
rs9418779	cg06406458	-0.35	-25.41	4.63e-68	0.326
rs9418787	cg06406458	-0.35	-25.41	4.63e-68	0.326
rs660101	cg24877975	0.18	25.41	4.87e-68	0.198
rs2762609	cg13562929	-0.16	-25.38	5.62e-68	0.174
rs10904493	cg13661397	-0.14	-25.38	5.95e-68	0.156
rs4929792	cg24443494	0.19	25.3	9.75e-68	0.196
rs10776570	cg02562448	0.14	25.25	1.38e-67	0.133
rs10776571	cg02562448	0.14	25.25	1.38e-67	0.133
rs10795275	cg13661397	-0.14	-25.22	1.63e-67	0.156
rs9418776	cg06406458	-0.35	-25.18	2.17e-67	0.328
rs2807737	cg11671940	0.22	25.14	2.88e-67	0.224
rs2767702	cg13562929	-0.16	-25.03	5.76e-67	0.175
rs2692771	cg13562929	-0.16	-25.03	5.76e-67	0.175
rs730429	cg02562448	0.14	25.02	6.1e-67	0.132
rs4934390	cg14812524	0.16	24.99	7.81e-67	0.149
rs1048956	cg14812524	0.16	24.92	1.18e-66	0.151
rs7894267	cg02562448	0.14	24.91	1.27e-66	0.133
rs7905145	cg02562448	0.14	24.91	1.27e-66	0.133
rs10857490	cg02562448	0.14	24.91	1.27e-66	0.133
rs11593606	cg02562448	0.14	24.91	1.27e-66	0.133
rs34457321	cg02562448	0.14	24.91	1.27e-66	0.133
rs10857491	cg02562448	0.14	24.91	1.27e-66	0.133
rs145132135	cg02562448	0.14	24.91	1.27e-66	0.133
rs145885637	cg02562448	0.14	24.91	1.27e-66	0.133
rs138228590	cg02562448	0.14	24.91	1.27e-66	0.133
rs12359850	cg02562448	0.14	24.91	1.27e-66	0.133
rs373676979	cg02562448	0.14	24.89	1.45e-66	0.133
rs375651602	cg02562448	0.14	24.89	1.45e-66	0.133
rs11814028	cg14418922	-0.19	-24.77	3.34e-66	0.19
rs11817844	cg14418922	-0.19	-24.77	3.34e-66	0.19
rs11814066	cg14418922	-0.19	-24.77	3.34e-66	0.19
rs9423584	cg08977827	-0.19	-24.75	3.64e-66	0.182
rs4934391	cg14812524	0.16	24.71	5.04e-66	0.15
rs6585266	cg24877975	0.18	24.61	9.47e-66	0.198
rs17558323	cg14418922	-0.2	-24.55	1.4e-65	0.192
rs1763405	cg07158320	-0.26	-24.5	2.05e-65	0.247
rs10824750	cg25423573	0.15	24.46	2.6e-65	0.154
rs77555177	cg07570687	0.13	24.46	2.6e-65	0.13
rs1418181	cg07158320	-0.26	-24.43	3.09e-65	0.247
rs1773869	cg07158320	-0.26	-24.43	3.09e-65	0.247
rs2783428	cg07158320	-0.26	-24.43	3.09e-65	0.247
rs7911653	cg14418922	-0.2	-24.39	4.17e-65	0.196
rs4881446	cg13661397	-0.14	-24.35	5.29e-65	0.154
rs2210963	cg17371064	-0.2	-24.34	5.77e-65	0.237
rs9418773	cg19572051	-0.23	-24.22	1.33e-64	0.216
rs9418694	cg19572051	-0.23	-24.22	1.33e-64	0.216
rs9418779	cg19572051	-0.23	-24.22	1.33e-64	0.216
rs9418787	cg19572051	-0.23	-24.22	1.33e-64	0.216
rs10883496	cg07570687	0.13	24.2	1.5e-64	0.128
rs3793772	cg07570687	0.13	24.2	1.5e-64	0.128
rs11190570	cg07570687	0.13	24.2	1.5e-64	0.128
rs10883497	cg07570687	0.13	24.2	1.5e-64	0.128
rs11190572	cg07570687	0.13	24.2	1.5e-64	0.128
rs11190573	cg07570687	0.13	24.2	1.5e-64	0.128
rs11190575	cg07570687	0.13	24.2	1.5e-64	0.128
rs79831012	cg07570687	0.13	24.2	1.5e-64	0.128
rs139301740;rs10883500;rs386747024	cg07570687	0.13	24.2	1.5e-64	0.128
rs10883501	cg07570687	0.13	24.2	1.5e-64	0.128
rs10883502	cg07570687	0.13	24.2	1.5e-64	0.128
rs11190581	cg07570687	0.13	24.2	1.5e-64	0.128
rs1572538	cg17371064	-0.21	-24.19	1.59e-64	0.226
rs9418789	cg06406458	-0.34	-24.17	1.82e-64	0.319
rs7920264	cg25969878	0.13	24.14	2.17e-64	0.125
rs11815117	cg14418922	-0.19	-24.14	2.28e-64	0.186
rs34046436	cg14418922	-0.19	-24.14	2.28e-64	0.186
rs2420936	cg07044115	-0.24	-24.12	2.58e-64	0.242
rs9418776	cg19572051	-0.23	-24.07	3.49e-64	0.218
rs9418761	cg06406458	-0.34	-24.07	3.62e-64	0.319
rs9418706	cg06406458	-0.34	-24.05	4.05e-64	0.32
rs55896038	cg07044115	-0.24	-24.04	4.4e-64	0.243
rs7091556	cg07044115	-0.24	-24.04	4.4e-64	0.243
rs11815086	cg14418922	-0.19	-24.02	4.97e-64	0.185
rs7920538	cg24795173	0.28	23.98	6.39e-64	0.309
rs34179582	cg14418922	-0.2	-23.96	7.27e-64	0.192
rs35295735	cg14418922	-0.2	-23.96	7.27e-64	0.192
rs1426616	cg14812524	0.16	23.95	8e-64	0.149
rs4285777	cg14418922	-0.2	-23.93	9.51e-64	0.197
rs4370823	cg14418922	-0.2	-23.93	9.51e-64	0.197
rs12780930	cg14418922	-0.2	-23.93	9.51e-64	0.197
rs11190560;rs745641123	cg07570687	0.13	23.92	9.8e-64	0.131
rs4919464	cg07570687	0.13	23.91	1.06e-63	0.128
rs4919465	cg07570687	0.13	23.91	1.06e-63	0.128
rs11190571	cg07570687	0.13	23.91	1.06e-63	0.128
rs10883499	cg07570687	0.13	23.91	1.06e-63	0.128
rs11190578	cg07570687	0.13	23.91	1.06e-63	0.128
rs2295770	cg07570687	0.13	23.91	1.06e-63	0.128
rs12355721	cg07570687	0.13	23.91	1.06e-63	0.128
rs75063298	cg07570687	0.13	23.86	1.52e-63	0.129
rs12219789	cg07570687	0.13	23.86	1.52e-63	0.129
rs11190562	cg07570687	0.13	23.86	1.52e-63	0.129
rs11190563	cg07570687	0.13	23.86	1.52e-63	0.129
rs7920870	cg07570687	0.13	23.86	1.52e-63	0.129
rs12358461	cg07570687	0.13	23.83	1.84e-63	0.128
rs57025426	cg07570687	0.13	23.81	2.06e-63	0.13
rs11190552	cg07570687	0.13	23.81	2.06e-63	0.13
rs11190553	cg07570687	0.13	23.81	2.06e-63	0.13
rs1106565	cg07570687	0.13	23.81	2.06e-63	0.13
rs7919256	cg14418922	-0.2	-23.8	2.26e-63	0.196
rs17558246	cg14418922	-0.19	-23.78	2.53e-63	0.186
rs2420936	cg08899523	0.23	23.78	2.59e-63	0.227
rs3923348	cg13661397	-0.14	-23.76	2.9e-63	0.151
rs4881438	cg13661397	-0.14	-23.76	2.9e-63	0.151
rs4418709	cg13661397	-0.14	-23.76	2.9e-63	0.151
rs55896038	cg08899523	0.23	23.73	3.66e-63	0.227
rs7091556	cg08899523	0.23	23.73	3.66e-63	0.227
rs3793771	cg07570687	0.13	23.71	3.97e-63	0.129
rs7920264	cg16106427	0.29	23.69	4.55e-63	0.274
rs17184356	cg09553982	-0.18	-23.69	4.62e-63	0.189
rs11817899	cg14418922	-0.19	-23.66	5.6e-63	0.187
rs2420936	cg06791446	-0.18	-23.64	6.39e-63	0.183
rs2485639	cg27555617	-0.05	-23.64	6.51e-63	0.051
rs2492775	cg27555617	-0.05	-23.64	6.51e-63	0.051
rs2485640	cg27555617	-0.05	-23.64	6.51e-63	0.051
rs2493897	cg27555617	-0.05	-23.64	6.51e-63	0.051
rs2819725	cg27555617	-0.05	-23.64	6.51e-63	0.051
rs17444839	cg09553982	-0.18	-23.64	6.58e-63	0.191
rs7081063	cg07570687	0.13	23.64	6.62e-63	0.129
rs7081003	cg07570687	0.13	23.64	6.62e-63	0.129
rs7080884	cg07570687	0.13	23.64	6.62e-63	0.129
rs2003284	cg07570687	0.13	23.64	6.62e-63	0.129
rs11190540	cg07570687	0.13	23.64	6.62e-63	0.129
rs11190541	cg07570687	0.13	23.64	6.62e-63	0.129
rs3936165	cg13563815	0.16	23.61	7.93e-63	0.169
rs10883498	cg07570687	0.13	23.58	9.79e-63	0.128
rs7900678	cg07570687	0.13	23.58	9.79e-63	0.128
rs55896038	cg06791446	-0.18	-23.58	9.96e-63	0.183
rs7091556	cg06791446	-0.18	-23.58	9.96e-63	0.183
rs4918278	cg24795173	0.28	23.57	1.06e-62	0.307
rs4586052	cg13661397	-0.14	-23.57	1.06e-62	0.151
rs6601967	cg13661397	-0.14	-23.57	1.06e-62	0.151
rs2814455	cg27555617	-0.05	-23.57	1.08e-62	0.051
rs2814457	cg27555617	-0.05	-23.57	1.08e-62	0.051
rs2786904	cg27555617	-0.05	-23.57	1.08e-62	0.051
rs4881165	cg17371064	-0.2	-23.55	1.18e-62	0.23
rs12098745	cg09553982	-0.18	-23.53	1.41e-62	0.191
rs11001622	cg09553982	-0.18	-23.53	1.41e-62	0.191
rs11101131;rs67790405	cg02562448	0.13	23.49	1.84e-62	0.131
rs2485633	cg27555617	-0.05	-23.47	2.02e-62	0.051
rs2485634	cg27555617	-0.05	-23.47	2.02e-62	0.051
rs9418789	cg19572051	-0.23	-23.44	2.59e-62	0.212
rs78824931	cg06406458	-0.34	-23.43	2.72e-62	0.322
rs7924137	cg11198398	0.16	23.43	2.75e-62	0.167
rs10904031	cg17371064	-0.2	-23.38	3.95e-62	0.23
rs10751926	cg17371064	-0.2	-23.38	3.95e-62	0.23
rs10751927	cg17371064	-0.2	-23.38	3.95e-62	0.23
rs6584379	cg07570687	0.13	23.35	4.65e-62	0.128
rs4929820	cg13563815	0.16	23.34	5.06e-62	0.163
rs2420936	cg25052156	-0.17	-23.33	5.51e-62	0.173
rs2819713	cg27555617	-0.05	-23.32	5.64e-62	0.051
rs827310	cg13398715	-0.15	-23.31	6.13e-62	0.149
rs9418761	cg19572051	-0.23	-23.29	7.04e-62	0.212
rs2819719	cg27555617	-0.05	-23.29	7.1e-62	0.051
rs2814450	cg27555617	-0.05	-23.29	7.1e-62	0.051
rs2819717	cg27555617	-0.05	-23.29	7.1e-62	0.051
rs2814451	cg27555617	-0.05	-23.29	7.1e-62	0.051
rs2814452	cg27555617	-0.05	-23.29	7.1e-62	0.051
rs2819716	cg27555617	-0.05	-23.29	7.1e-62	0.051
rs2819712	cg27555617	-0.05	-23.29	7.1e-62	0.051
rs2819710	cg27555617	-0.05	-23.29	7.1e-62	0.051
rs2819709	cg27555617	-0.05	-23.29	7.1e-62	0.051
rs1105367	cg27555617	-0.05	-23.29	7.1e-62	0.051
rs1105366	cg27555617	-0.05	-23.29	7.1e-62	0.051
rs2786884	cg27555617	-0.05	-23.29	7.1e-62	0.051
rs2814454	cg27555617	-0.05	-23.29	7.1e-62	0.051
rs2493899	cg27555617	-0.05	-23.29	7.1e-62	0.051
rs2492773	cg27555617	-0.05	-23.29	7.1e-62	0.051
rs2492774	cg27555617	-0.05	-23.29	7.1e-62	0.051
rs2786903	cg27555617	-0.05	-23.29	7.1e-62	0.051
rs35935154	cg14418922	-0.19	-23.28	7.8e-62	0.187
rs1250587	cg06073814	0.16	23.28	7.91e-62	0.17
rs9418706	cg19572051	-0.23	-23.26	8.73e-62	0.213
rs4919462	cg07570687	0.13	23.25	9.47e-62	0.128
rs4919463	cg07570687	0.13	23.25	9.47e-62	0.128
rs7906394	cg07570687	0.13	23.25	9.47e-62	0.128
rs1250584	cg06073814	0.16	23.24	9.85e-62	0.167
rs55896038	cg25052156	-0.17	-23.24	9.99e-62	0.174
rs7091556	cg25052156	-0.17	-23.24	9.99e-62	0.174
rs67338516	cg09553982	-0.18	-23.22	1.13e-61	0.191
rs10883492	cg07570687	0.13	23.21	1.24e-61	0.129
rs10883493	cg07570687	0.13	23.21	1.24e-61	0.129
rs11190555	cg07570687	0.13	23.21	1.24e-61	0.129
rs11190556	cg07570687	0.13	23.21	1.24e-61	0.129
rs11190557	cg07570687	0.13	23.21	1.24e-61	0.129
rs11190558	cg07570687	0.13	23.21	1.24e-61	0.129
rs7085261	cg07570687	0.13	23.21	1.24e-61	0.129
rs7085439	cg07570687	0.13	23.21	1.24e-61	0.129
rs4881450	cg13661397	-0.14	-23.2	1.31e-61	0.151
rs1250588	cg06073814	0.16	23.18	1.55e-61	0.17
rs7914425	cg06279296	0.22	23.16	1.78e-61	0.263
rs7917823	cg06279296	0.22	23.16	1.78e-61	0.263
rs7917949	cg06279296	0.22	23.16	1.78e-61	0.263
rs7074740	cg06279296	0.22	23.16	1.78e-61	0.263
rs11816987	cg14418922	-0.19	-23.15	1.84e-61	0.193
rs10745269	cg14436939	-0.16	-23.13	2.11e-61	0.157
rs6584773	cg24795173	0.28	23.13	2.12e-61	0.307
rs58828402	cg06279296	0.22	23.12	2.22e-61	0.261
rs11253163	cg06279296	0.22	23.12	2.37e-61	0.261
rs151239879	cg15590007	0.13	23.11	2.38e-61	0.142
rs150423942	cg15590007	0.13	23.11	2.38e-61	0.142
rs75129876	cg15590007	0.13	23.11	2.38e-61	0.142
rs77200598	cg15590007	0.13	23.11	2.38e-61	0.142
rs55717607	cg15590007	0.13	23.11	2.38e-61	0.142
rs11239491	cg15590007	0.13	23.11	2.38e-61	0.142
rs7084793	cg15590007	0.13	23.11	2.38e-61	0.142
rs7921503	cg15590007	0.13	23.11	2.38e-61	0.142
rs7909740	cg15590007	0.13	23.11	2.38e-61	0.142
rs7909768	cg15590007	0.13	23.11	2.38e-61	0.142
rs7913488	cg15590007	0.13	23.11	2.38e-61	0.142
rs67491417	cg15590007	0.13	23.11	2.38e-61	0.142
rs6413416	cg15590007	0.13	23.11	2.38e-61	0.142
rs4986832	cg15590007	0.13	23.11	2.38e-61	0.142
rs7913948	cg15590007	0.13	23.11	2.38e-61	0.142
rs12762303	cg15590007	0.13	23.11	2.38e-61	0.142
rs78137087	cg15590007	0.13	23.11	2.38e-61	0.142
rs72561472	cg15590007	0.13	23.11	2.38e-61	0.142
rs4987106	cg15590007	0.13	23.11	2.38e-61	0.142
rs111528152	cg15590007	0.13	23.11	2.38e-61	0.142
rs12763738	cg15590007	0.13	23.11	2.38e-61	0.142
rs66489870	cg15590007	0.13	23.11	2.38e-61	0.142
rs71494775	cg15590007	0.13	23.11	2.38e-61	0.142
rs1864414	cg15590007	0.13	23.11	2.38e-61	0.142
rs1864413	cg15590007	0.13	23.11	2.38e-61	0.142
rs1864412	cg15590007	0.13	23.11	2.38e-61	0.142
rs7093951	cg06279296	0.22	23.11	2.52e-61	0.261
rs67354918	cg06279296	0.22	23.11	2.52e-61	0.261
rs4508132	cg26679884	0.43	23.09	2.72e-61	0.442
rs34790195	cg14418922	-0.19	-23.09	2.9e-61	0.189
rs12269237	cg26540559	0.06	23.08	2.91e-61	0.058
rs10745266	cg14436939	-0.16	-23.07	3.23e-61	0.156
rs11257380	cg21322043	0.34	23.07	3.29e-61	0.372
rs73581620	cg06279296	0.22	23.07	3.33e-61	0.263
rs113210208	cg06279296	0.22	23.07	3.33e-61	0.263
rs7912391	cg06279296	0.22	23.07	3.33e-61	0.263
rs7910971	cg14418922	-0.19	-23.06	3.46e-61	0.184
rs17473271	cg14418922	-0.19	-23.06	3.46e-61	0.184
rs12252088	cg06279296	0.23	23.06	3.54e-61	0.264
rs12266646	cg06279296	0.23	23.05	3.63e-61	0.264
rs58217739	cg06279296	0.23	23.05	3.66e-61	0.261
rs7101060	cg14436939	-0.16	-23.05	3.74e-61	0.157
rs6537560	cg14436939	-0.16	-23.05	3.74e-61	0.157
rs11190551	cg07570687	0.13	23.05	3.81e-61	0.129
rs2795092	cg07158320	-0.23	-23.04	3.98e-61	0.235
rs17113137	cg07570687	0.13	23.02	4.46e-61	0.13
rs10887024	cg13812702	0.11	23.01	4.83e-61	0.112
rs10437448	cg14436939	-0.16	-23.01	5.01e-61	0.157
rs7086070	cg14436939	-0.16	-23	5.06e-61	0.154
rs883604	cg14436939	-0.16	-23	5.06e-61	0.154
rs2420936	cg16653991	0.22	22.99	5.43e-61	0.225
rs10218874	cg14436939	-0.16	-22.99	5.48e-61	0.153
rs11257377	cg21322043	0.34	22.99	5.65e-61	0.371
rs11257378	cg21322043	0.34	22.99	5.65e-61	0.371
rs12360492	cg21322043	0.34	22.99	5.65e-61	0.371
rs1250582	cg06073814	0.15	22.99	5.76e-61	0.163
rs10745270	cg14436939	-0.16	-22.98	6.05e-61	0.154
rs11101298	cg14436939	-0.16	-22.98	6.05e-61	0.154
rs4838406	cg14436939	-0.16	-22.98	6.05e-61	0.154
rs10857560	cg14436939	-0.16	-22.98	6.05e-61	0.154
rs6588753	cg24443494	0.2	22.98	6.16e-61	0.195
rs55896038	cg16653991	0.22	22.95	7.25e-61	0.226
rs7091556	cg16653991	0.22	22.95	7.25e-61	0.226
rs4987105	cg15590007	0.14	22.94	7.7e-61	0.142
rs11101306	cg14436939	-0.16	-22.93	8.55e-61	0.154
rs2018882	cg13562929	-0.16	-22.9	1.07e-60	0.172
rs2783429	cg07158320	-0.23	-22.89	1.11e-60	0.234
rs4880352	cg25969878	0.13	22.89	1.15e-60	0.112
rs11815080	cg14418922	-0.19	-22.88	1.2e-60	0.182
rs11817109	cg14418922	-0.19	-22.88	1.2e-60	0.182
rs11815118	cg14418922	-0.19	-22.88	1.2e-60	0.182
rs17558167	cg14418922	-0.19	-22.88	1.2e-60	0.182
rs17558195	cg14418922	-0.19	-22.88	1.2e-60	0.182
rs3998843	cg14418922	-0.19	-22.88	1.2e-60	0.182
rs1250589	cg06073814	0.16	22.88	1.21e-60	0.171
rs17382898	cg19681037	0.16	22.86	1.38e-60	0.156
rs12255632	cg06279296	0.22	22.86	1.38e-60	0.26
rs10887796	cg14812524	0.16	22.86	1.4e-60	0.149
rs4880352	cg19754622	0.25	22.85	1.42e-60	0.222
rs2804556	cg07158320	-0.23	-22.85	1.44e-60	0.231
rs10883494	cg07570687	0.13	22.85	1.51e-60	0.128
rs2493898	cg27555617	-0.05	-22.84	1.56e-60	0.051
rs2210964	cg17371064	-0.2	-22.83	1.71e-60	0.228
rs10795041	cg17371064	-0.2	-22.83	1.71e-60	0.228
rs10795042	cg17371064	-0.2	-22.83	1.71e-60	0.228
rs10795043	cg17371064	-0.2	-22.83	1.71e-60	0.228
rs10795044	cg17371064	-0.2	-22.83	1.71e-60	0.228
rs10904034	cg17371064	-0.2	-22.83	1.71e-60	0.228
rs4147143	cg17371064	-0.2	-22.83	1.71e-60	0.228
rs10795045	cg17371064	-0.2	-22.83	1.71e-60	0.228
rs4881166	cg17371064	-0.2	-22.83	1.71e-60	0.228
rs10786772	cg01727419	-0.09	-22.81	1.95e-60	0.094
rs6593482	cg15590007	0.13	22.8	2.12e-60	0.14
rs67008983	cg15590007	0.13	22.8	2.12e-60	0.14
rs55787481	cg15590007	0.13	22.8	2.12e-60	0.14
rs12783095	cg15590007	0.13	22.8	2.12e-60	0.14
rs17157728	cg15590007	0.13	22.8	2.12e-60	0.14
rs17157733	cg15590007	0.13	22.8	2.12e-60	0.14
rs56150414	cg15590007	0.13	22.78	2.37e-60	0.14
rs7078822	cg15590007	0.14	22.77	2.56e-60	0.141
rs7093687	cg15590007	0.14	22.77	2.56e-60	0.141
rs7081004	cg15590007	0.14	22.77	2.56e-60	0.141
rs2814456	cg27555617	-0.05	-22.77	2.62e-60	0.051
rs7897613	cg24795173	0.28	22.76	2.65e-60	0.305
rs1984905	cg26679884	0.42	22.76	2.81e-60	0.441
rs4880352	cg16106427	0.28	22.72	3.57e-60	0.247
rs4495823	cg26679884	0.43	22.71	3.75e-60	0.442
rs11257384	cg21322043	0.34	22.71	3.8e-60	0.361
rs2492768	cg27555617	-0.05	-22.68	4.6e-60	0.051
rs2493896	cg27555617	-0.05	-22.68	4.6e-60	0.051
rs2492771	cg27555617	-0.05	-22.68	4.6e-60	0.051
rs10857562	cg14436939	-0.16	-22.67	4.98e-60	0.153
rs1972949	cg14436939	-0.16	-22.67	4.98e-60	0.153
rs7924070	cg14436939	-0.16	-22.67	4.98e-60	0.153
rs10508903	cg14436939	-0.16	-22.67	4.98e-60	0.153
rs4838590	cg14436939	-0.16	-22.67	4.98e-60	0.153
rs9284	cg14436939	-0.16	-22.67	4.98e-60	0.153
rs78758365	cg21322043	0.34	22.65	5.64e-60	0.375
rs9419541	cg26679884	0.42	22.63	6.67e-60	0.44
rs61846313	cg21322043	0.34	22.62	6.97e-60	0.374
rs7075976	cg14436939	-0.16	-22.62	7.32e-60	0.152
rs12217860	cg14240646	0.25	22.61	7.52e-60	0.239
rs10883928	cg01727419	-0.09	-22.61	7.7e-60	0.095
rs1250590	cg06073814	0.16	22.6	7.97e-60	0.17
rs78824931	cg19572051	-0.23	-22.6	8.37e-60	0.214
rs4147145	cg17371064	-0.2	-22.6	8.4e-60	0.229
rs4881167	cg17371064	-0.2	-22.6	8.4e-60	0.229
rs10903415	cg02305391	0.18	22.6	8.47e-60	0.195
rs2082108	cg15590007	0.13	22.58	9.71e-60	0.142
rs12354994	cg15590007	0.13	22.58	9.71e-60	0.142
rs12354742	cg15590007	0.13	22.58	9.71e-60	0.142
rs11517281	cg15590007	0.13	22.58	9.71e-60	0.142
rs12359299	cg15590007	0.13	22.58	9.71e-60	0.142
rs11523408	cg15590007	0.13	22.58	9.71e-60	0.142
rs12359302	cg15590007	0.13	22.55	1.15e-59	0.143
rs58898174;rs201202504;rs386748564	cg00809775	0.12	22.53	1.3e-59	0.134
rs7093768	cg00809775	0.12	22.53	1.3e-59	0.134
rs2885521	cg00809775	0.12	22.53	1.3e-59	0.134
rs11245330	cg00809775	0.12	22.53	1.3e-59	0.134
rs11245331	cg00809775	0.12	22.53	1.3e-59	0.134
rs2420936	cg10379346	-0.23	-22.53	1.37e-59	0.226
rs11250382	cg02305391	0.18	22.52	1.42e-59	0.199
rs2819721	cg27555617	-0.05	-22.52	1.46e-59	0.05
rs2814449	cg27555617	-0.05	-22.52	1.46e-59	0.05
rs2819714	cg27555617	-0.05	-22.52	1.46e-59	0.05
rs2485637	cg27555617	-0.05	-22.52	1.46e-59	0.05
rs2485638	cg27555617	-0.05	-22.52	1.46e-59	0.05
rs60928707	cg19681037	0.16	22.52	1.48e-59	0.156
rs10509695	cg19681037	0.16	22.52	1.48e-59	0.156
rs11245329	cg00809775	0.12	22.51	1.56e-59	0.134
rs56180358	cg15590007	0.13	22.5	1.67e-59	0.145
rs11188541	cg19681037	0.16	22.5	1.7e-59	0.158
rs12780491	cg07889765	-0.16	-22.49	1.78e-59	0.177
rs4748064	cg07629776	0.16	22.48	1.86e-59	0.16
rs10776598	cg14436939	-0.16	-22.48	1.9e-59	0.152
rs4962681	cg00809775	0.12	22.48	1.95e-59	0.134
rs9419459	cg26679884	0.42	22.47	1.99e-59	0.439
rs55965812	cg15590007	0.14	22.47	2.08e-59	0.143
rs12354712	cg15590007	0.14	22.47	2.08e-59	0.143
rs55896038	cg10379346	-0.23	-22.46	2.17e-59	0.227
rs7091556	cg10379346	-0.23	-22.46	2.17e-59	0.227
rs7091346	cg01727419	-0.09	-22.44	2.43e-59	0.094
rs10904038	cg17371064	-0.21	-22.42	2.89e-59	0.228
rs7919817	cg20673407	-0.33	-22.39	3.47e-59	0.342
rs2105282	cg20673407	-0.33	-22.38	3.75e-59	0.341
rs76502537	cg23771949	-0.17	-22.38	3.9e-59	0.189
rs7078199	cg26679884	0.42	22.32	5.74e-59	0.441
rs7918960	cg26679884	0.42	22.32	5.74e-59	0.441
rs10882435	cg07889765	-0.16	-22.31	6.09e-59	0.175
rs11187899	cg07889765	-0.16	-22.31	6.09e-59	0.175
rs55986122	cg15590007	0.13	22.31	6.2e-59	0.143
rs2099170	cg15590007	0.13	22.31	6.2e-59	0.143
rs7093571	cg13661397	-0.14	-22.3	6.77e-59	0.147
rs10795278	cg13661397	-0.14	-22.3	6.77e-59	0.147
rs2819723	cg27555617	-0.05	-22.29	7.25e-59	0.051
rs2786889	cg27555617	-0.05	-22.29	7.25e-59	0.051
rs1006368	cg00809775	0.12	22.25	9.42e-59	0.135
rs2295786	cg01727419	-0.09	-22.23	1.09e-58	0.094
rs11191833	cg01727419	-0.09	-22.23	1.09e-58	0.094
rs11001620	cg09553982	-0.18	-22.21	1.21e-58	0.184
rs1250583	cg06073814	0.16	22.21	1.25e-58	0.163
rs4917901	cg07570687	0.13	22.19	1.4e-58	0.127
rs7913021	cg06279296	0.22	22.17	1.59e-58	0.258
rs4881370	cg26679884	0.42	22.16	1.73e-58	0.44
rs11191839	cg01727419	-0.09	-22.16	1.75e-58	0.095
rs11191840	cg01727419	-0.09	-22.16	1.75e-58	0.095
rs10795293	cg26679884	0.41	22.14	1.99e-58	0.44
rs7901595	cg13563815	0.16	22.14	2.06e-58	0.163
rs10857566	cg14436939	-0.16	-22.14	2.07e-58	0.151
rs4748784	cg13562929	-0.16	-22.13	2.11e-58	0.17
rs2492769	cg27555617	-0.05	-22.13	2.11e-58	0.051
rs2786888	cg27555617	-0.05	-22.13	2.23e-58	0.05
rs11187900	cg07889765	-0.16	-22.12	2.35e-58	0.173
rs4881452	cg13661397	-0.14	-22.09	2.84e-58	0.15
rs4881453	cg13661397	-0.14	-22.09	2.84e-58	0.15
rs61849039	cg14240646	0.25	22.09	2.94e-58	0.238
rs4749240	cg14240646	0.25	22.09	2.94e-58	0.238
rs10882436	cg07889765	-0.16	-22.08	3.02e-58	0.171
rs11257368	cg21322043	0.33	22.07	3.32e-58	0.361
rs11253187	cg13661397	-0.14	-22.07	3.39e-58	0.146
rs4633386	cg07570687	0.13	22.02	4.82e-58	0.125
rs35906360	cg15590007	0.13	22	5.5e-58	0.142
rs2993981	cg11671940	0.21	21.99	5.68e-58	0.211
rs2993982	cg11671940	0.21	21.99	5.68e-58	0.211
rs2993985	cg11671940	0.21	21.99	5.68e-58	0.211
rs11187893	cg07889765	-0.16	-21.99	5.87e-58	0.174
rs11187894	cg07889765	-0.16	-21.99	5.87e-58	0.174
rs7477466	cg13661397	-0.14	-21.96	7.22e-58	0.15
rs4750128	cg21322043	0.33	21.94	7.98e-58	0.36
rs61848172	cg21322043	0.33	21.94	7.98e-58	0.36
rs55978138	cg15590007	0.14	21.94	7.98e-58	0.142
rs4918058	cg01727419	-0.09	-21.93	8.57e-58	0.095
rs11253064	cg06279296	0.22	21.93	9.07e-58	0.263
rs11245332	cg00809775	0.12	21.92	9.43e-58	0.13
rs9423611	cg13661397	-0.14	-21.9	1.05e-57	0.152
rs11188534	cg19681037	0.15	21.88	1.22e-57	0.152
rs7070067	cg26679884	0.4	21.87	1.36e-57	0.44
rs11188531	cg19681037	0.15	21.86	1.39e-57	0.15
rs55983834	cg01727419	-0.09	-21.86	1.42e-57	0.095
rs2420936	cg19650936	0.13	21.85	1.58e-57	0.127
rs11257388	cg21322043	0.34	21.84	1.62e-57	0.367
rs6481817	cg00146027	-0.15	-21.83	1.73e-57	0.168
rs7901543	cg00146027	-0.15	-21.83	1.73e-57	0.168
rs6481818	cg00146027	-0.15	-21.83	1.73e-57	0.168
rs6481819	cg00146027	-0.15	-21.83	1.73e-57	0.168
rs10795038	cg17371064	-0.2	-21.83	1.78e-57	0.23
rs7093269	cg17371064	-0.2	-21.83	1.78e-57	0.23
rs55744330	cg17371064	-0.2	-21.83	1.78e-57	0.23
rs2814446	cg27555617	-0.05	-21.82	1.85e-57	0.051
rs61871140	cg19681037	0.15	21.81	2.03e-57	0.153
rs55896038	cg19650936	0.13	21.81	2.07e-57	0.127
rs7091556	cg19650936	0.13	21.81	2.07e-57	0.127
rs4929793	cg13563815	0.16	21.81	2.09e-57	0.164
rs7915508	cg13563815	0.16	21.81	2.09e-57	0.164
rs28612146	cg13563815	0.16	21.81	2.09e-57	0.164
rs11239492	cg15590007	0.13	21.8	2.15e-57	0.139
rs10795294	cg26679884	0.4	21.8	2.21e-57	0.44
rs4881457	cg13661397	-0.14	-21.8	2.24e-57	0.146
rs4353201	cg26679884	0.4	21.79	2.29e-57	0.44
rs4881491	cg26679884	0.4	21.79	2.29e-57	0.44
rs67304285	cg09553982	-0.18	-21.79	2.39e-57	0.187
rs373485798;rs376308936;rs997907;rs68144911	cg26865853	-0.09	-21.78	2.46e-57	0.089
rs4881435	cg13661397	-0.14	-21.78	2.52e-57	0.151
rs7918430	cg13661397	-0.14	-21.78	2.52e-57	0.151
rs6601961	cg13661397	-0.14	-21.78	2.52e-57	0.151
rs11191829	cg01727419	-0.09	-21.76	2.89e-57	0.094
rs67764572	cg01727419	-0.09	-21.73	3.61e-57	0.095
rs2786900	cg27555617	-0.05	-21.71	4.15e-57	0.05
rs10795936	cg14675598	0.19	21.71	4.25e-57	0.187
rs6481820	cg00146027	-0.15	-21.68	5.07e-57	0.169
rs113255940	cg07570687	0.13	21.67	5.28e-57	0.126
rs10751928	cg17371064	-0.2	-21.67	5.56e-57	0.226
rs2802360	cg06073814	0.15	21.67	5.57e-57	0.164
rs11002769	cg05119883	0.23	21.66	5.97e-57	0.223
rs11191822	cg01727419	-0.09	-21.65	6.05e-57	0.094
rs2814447	cg27555617	-0.05	-21.65	6.29e-57	0.05
rs11190661	cg26540559	0.06	21.63	7.17e-57	0.058
rs61871589	cg26540559	0.06	21.63	7.17e-57	0.058
rs12267029	cg26540559	0.06	21.63	7.17e-57	0.058
rs7893218	cg06279296	0.22	21.62	7.51e-57	0.265
rs7919523	cg14240646	0.24	21.62	7.59e-57	0.234
rs9418756	cg06406458	-0.32	-21.59	9.29e-57	0.306
rs4462286	cg03955764	-0.13	-21.59	9.37e-57	0.133
rs11191836	cg01727419	-0.09	-21.59	9.89e-57	0.094
rs4444003	cg26679884	0.41	21.58	9.93e-57	0.443
rs816650	cg06279296	0.21	21.57	1.11e-56	0.254
rs4880615	cg17371064	-0.2	-21.57	1.12e-56	0.229
rs11593110	cg25423573	0.14	21.57	1.13e-56	0.153
rs2807735	cg11671940	0.21	21.54	1.39e-56	0.209
rs1416816	cg11671940	0.21	21.54	1.39e-56	0.209
rs2486638	cg11671940	0.21	21.54	1.39e-56	0.209
rs2420936	cg02210151	-0.16	-21.54	1.4e-56	0.162
rs4344425	cg19681037	0.16	21.54	1.4e-56	0.156
rs28496118	cg24443494	0.19	21.5	1.77e-56	0.19
rs11252919	cg06279296	0.22	21.48	2.07e-56	0.263
rs55896038	cg02210151	-0.16	-21.47	2.15e-56	0.162
rs7091556	cg02210151	-0.16	-21.47	2.15e-56	0.162
rs11250372	cg02305391	0.18	21.47	2.18e-56	0.183
rs10885620	cg19990189	-0.13	-21.47	2.21e-56	0.14
rs10786773	cg01727419	-0.09	-21.46	2.33e-56	0.094
rs4287273	cg26679884	0.41	21.46	2.35e-56	0.442
rs4929794	cg13563815	0.16	21.46	2.43e-56	0.165
rs200633850;rs373297316;rs544053516	cg15590007	0.13	21.45	2.48e-56	0.139
rs1426615	cg14812524	0.15	21.43	3.06e-56	0.145
rs3780896	cg15590007	0.13	21.41	3.3e-56	0.139
rs3780897	cg15590007	0.13	21.41	3.3e-56	0.139
rs9665365	cg15590007	0.13	21.41	3.38e-56	0.148
rs9418802	cg06406458	-0.33	-21.37	4.66e-56	0.308
rs9418695	cg06406458	-0.32	-21.36	4.77e-56	0.303
rs4242802	cg26679884	0.41	21.35	5.14e-56	0.441
rs11511620	cg15590007	0.14	21.35	5.19e-56	0.142
rs9418756	cg19572051	-0.22	-21.35	5.34e-56	0.205
rs12356109	cg15590007	0.13	21.33	6.1e-56	0.139
rs11511619	cg15590007	0.13	21.33	6.1e-56	0.139
rs61559520	cg19681037	0.15	21.31	7.14e-56	0.151
rs2694771	cg08240913	0.16	21.3	7.27e-56	0.188
rs201315774	cg02305391	0.18	21.29	7.85e-56	0.186
rs2790460	cg11671940	0.21	21.28	8.57e-56	0.214
rs2475213	cg01727419	-0.09	-21.28	8.61e-56	0.093
rs1057526	cg06406458	-0.32	-21.28	8.7e-56	0.299
rs3121059	cg11671940	0.22	21.28	8.74e-56	0.215
rs9418754	cg06406458	-0.32	-21.27	9.05e-56	0.304
rs2819722	cg27555617	-0.05	-21.26	9.78e-56	0.05
rs2786886	cg27555617	-0.05	-21.26	9.78e-56	0.05
rs2819726	cg27555617	-0.05	-21.26	9.78e-56	0.05
rs2485636	cg27555617	-0.05	-21.26	9.78e-56	0.05
rs2492772	cg27555617	-0.05	-21.26	9.78e-56	0.05
rs4354631	cg26679884	0.41	21.23	1.19e-55	0.442
rs11190574	cg07570687	0.13	21.22	1.35e-55	0.129
rs7898802	cg25423573	0.14	21.2	1.45e-55	0.15
rs7072508	cg08899523	0.22	21.2	1.51e-55	0.217
rs7918550	cg08899523	0.22	21.2	1.51e-55	0.217
rs7905593	cg08899523	0.22	21.2	1.51e-55	0.217
rs11594976	cg08899523	0.22	21.2	1.51e-55	0.217
rs28688373	cg08899523	0.22	21.2	1.51e-55	0.217
rs2819718	cg27555617	-0.05	-21.19	1.6e-55	0.05
rs7897382	cg14418922	-0.18	-21.19	1.61e-55	0.184
rs10887024	cg09943237	0.06	21.19	1.64e-55	0.059
rs11200264	cg13812702	0.11	21.18	1.7e-55	0.109
rs4329635	cg03955764	-0.13	-21.15	2.14e-55	0.132
rs4747950	cg21322043	0.33	21.15	2.15e-55	0.368
rs11257390	cg21322043	0.33	21.15	2.15e-55	0.368
rs9418754	cg19572051	-0.21	-21.15	2.2e-55	0.204
rs2819711	cg27555617	-0.05	-21.15	2.21e-55	0.05
rs57294882	cg19681037	0.15	21.15	2.22e-55	0.15
rs11255060	cg13562929	-0.16	-21.14	2.23e-55	0.171
rs58238740	cg15590007	0.13	21.13	2.41e-55	0.137
rs3780894	cg15590007	0.13	21.13	2.41e-55	0.137
rs3780895	cg15590007	0.13	21.13	2.41e-55	0.137
rs2310776	cg15590007	0.13	21.13	2.41e-55	0.137
rs17157736	cg15590007	0.13	21.13	2.41e-55	0.137
rs7077891	cg15590007	0.13	21.13	2.41e-55	0.137
rs11191865	cg26865853	-0.09	-21.13	2.55e-55	0.089
rs1057526	cg19572051	-0.21	-21.12	2.63e-55	0.2
rs1563822	cg07899896	0.19	21.1	2.99e-55	0.216
rs35818904	cg05119883	0.23	21.09	3.22e-55	0.225
rs28379249	cg13563815	0.16	21.09	3.32e-55	0.163
rs7076074	cg13563815	0.16	21.08	3.4e-55	0.163
rs9418802	cg19572051	-0.22	-21.08	3.56e-55	0.206
rs7906287	cg26679884	0.4	21.07	3.66e-55	0.443
rs9418788	cg06406458	-0.32	-21.07	3.67e-55	0.3
rs1057527	cg06406458	-0.32	-21.07	3.67e-55	0.3
rs2067832	cg26865853	-0.09	-21.06	3.92e-55	0.089
rs58543155	cg26865853	-0.09	-21.06	3.92e-55	0.089
rs34300861	cg26865853	-0.09	-21.06	3.92e-55	0.089
rs61277100	cg26865853	-0.09	-21.06	3.92e-55	0.089
rs34887477	cg26865853	-0.09	-21.06	3.92e-55	0.089
rs4918067	cg26865853	-0.09	-21.06	3.92e-55	0.089
rs4918068	cg26865853	-0.09	-21.06	3.92e-55	0.089
rs9325507	cg26865853	-0.09	-21.06	3.92e-55	0.089
rs3814220	cg26865853	-0.09	-21.06	3.92e-55	0.089
rs11191843	cg26865853	-0.09	-21.06	3.92e-55	0.089
rs2273698	cg26865853	-0.09	-21.06	3.92e-55	0.089
rs11191846	cg26865853	-0.09	-21.06	3.92e-55	0.089
rs10883940	cg26865853	-0.09	-21.06	3.92e-55	0.089
rs11191847	cg26865853	-0.09	-21.06	3.92e-55	0.089
rs10883941	cg26865853	-0.09	-21.06	3.92e-55	0.089
rs11191848	cg26865853	-0.09	-21.06	3.92e-55	0.089
rs11191849	cg26865853	-0.09	-21.06	3.92e-55	0.089
rs10883942	cg26865853	-0.09	-21.06	3.92e-55	0.089
rs10883943	cg26865853	-0.09	-21.06	3.92e-55	0.089
rs1980653	cg26865853	-0.09	-21.06	3.92e-55	0.089
rs11598018	cg26865853	-0.09	-21.06	3.92e-55	0.089
rs10883948	cg26865853	-0.09	-21.06	3.92e-55	0.089
rs1570221	cg01727419	-0.09	-21.04	4.69e-55	0.092
rs2475216	cg01727419	-0.09	-21.04	4.69e-55	0.092
rs9420904	cg01727419	-0.09	-21.04	4.69e-55	0.092
rs149676388	cg01727419	-0.09	-21.04	4.69e-55	0.092
rs371240513	cg01727419	-0.09	-21.04	4.69e-55	0.092
rs12765878	cg26865853	-0.09	-21.04	4.78e-55	0.089
rs374586152	cg01727419	-0.09	-21.03	4.96e-55	0.093
rs61871138	cg19681037	0.15	21.03	5.18e-55	0.15
rs11250370	cg02305391	0.18	21	6.08e-55	0.186
rs2993980	cg11671940	0.21	20.98	7.14e-55	0.215
rs11239485	cg15590007	0.13	20.96	8.2e-55	0.143
rs3904957	cg03955764	-0.13	-20.94	9.6e-55	0.132
rs946594	cg11671940	0.21	20.93	1.02e-54	0.213
rs1416817	cg11671940	0.21	20.93	1.02e-54	0.213
rs2998285	cg11671940	0.21	20.93	1.02e-54	0.213
rs4237390	cg11671940	0.21	20.93	1.02e-54	0.213
rs2486637	cg11671940	0.21	20.93	1.02e-54	0.213
rs9418695	cg19572051	-0.21	-20.93	1.05e-54	0.202
rs56163820	cg27555617	-0.05	-20.91	1.15e-54	0.051
rs9418788	cg19572051	-0.21	-20.89	1.35e-54	0.201
rs1057527	cg19572051	-0.21	-20.89	1.35e-54	0.201
rs12217597	cg07889765	-0.16	-20.89	1.39e-54	0.175
rs73574227	cg06279296	0.22	20.88	1.42e-54	0.258
rs60842538	cg15590007	0.13	20.88	1.42e-54	0.139
rs3780899	cg15590007	0.13	20.88	1.42e-54	0.139
rs10904504	cg13661397	-0.15	-20.86	1.66e-54	0.152
rs370232405	cg15590007	0.13	20.86	1.67e-54	0.145
rs12774369	cg15590007	0.13	20.85	1.8e-54	0.138
rs7901736	cg17371064	-0.2	-20.81	2.34e-54	0.224
rs73576221	cg06279296	0.22	20.81	2.46e-54	0.255
rs4881459	cg13661397	-0.14	-20.8	2.56e-54	0.145
rs2694764	cg08240913	0.15	20.79	2.71e-54	0.187
rs2245164	cg08240913	0.15	20.79	2.78e-54	0.187
rs2694770	cg08240913	0.15	20.79	2.78e-54	0.187
rs4751956	cg08240913	0.15	20.79	2.85e-54	0.188
rs3781552	cg08240913	0.15	20.79	2.85e-54	0.188
rs7072508	cg07044115	-0.23	-20.78	2.99e-54	0.229
rs7918550	cg07044115	-0.23	-20.78	2.99e-54	0.229
rs7905593	cg07044115	-0.23	-20.78	2.99e-54	0.229
rs11594976	cg07044115	-0.23	-20.78	2.99e-54	0.229
rs28688373	cg07044115	-0.23	-20.78	2.99e-54	0.229
rs7902280	cg08899523	0.22	20.77	3.1e-54	0.215
rs284624	cg07899896	0.19	20.76	3.32e-54	0.217
rs284622	cg07899896	0.19	20.76	3.32e-54	0.217
rs2446721	cg07899896	0.19	20.75	3.74e-54	0.216
rs1903252	cg07899896	0.19	20.75	3.74e-54	0.216
rs1903253	cg07899896	0.19	20.75	3.74e-54	0.216
rs1824428	cg07899896	0.19	20.75	3.74e-54	0.216
rs2446719	cg07899896	0.19	20.75	3.74e-54	0.216
rs2694768	cg08240913	0.15	20.74	4.09e-54	0.187
rs2694769	cg08240913	0.15	20.74	4.09e-54	0.187
rs3862875	cg03955764	-0.13	-20.72	4.51e-54	0.132
rs2393534	cg07899896	0.19	20.72	4.69e-54	0.214
rs10763599	cg07899896	0.19	20.72	4.69e-54	0.214
rs898372	cg07899896	0.19	20.71	4.82e-54	0.219
rs2780669	cg14240646	0.24	20.71	4.92e-54	0.227
rs2993987	cg11671940	0.21	20.69	5.65e-54	0.207
rs1572536	cg17371064	-0.2	-20.69	5.8e-54	0.224
rs7920264	cg19754622	0.25	20.68	6.22e-54	0.235
rs4313493	cg27555617	-0.05	-20.63	8.77e-54	0.051
rs72815521	cg09553982	-0.18	-20.61	1.02e-53	0.186
rs11245348	cg00809775	0.12	20.61	1.02e-53	0.133
rs2062387	cg00809775	0.12	20.61	1.02e-53	0.133
rs34402725	cg00809775	0.12	20.61	1.02e-53	0.133
rs7902846	cg00809775	0.12	20.61	1.02e-53	0.133
rs35137435	cg00809775	0.12	20.61	1.02e-53	0.133
rs11595063	cg00809775	0.12	20.61	1.02e-53	0.133
rs12416106	cg00809775	0.12	20.61	1.02e-53	0.133
rs4962698	cg00809775	0.12	20.61	1.02e-53	0.133
rs4962407	cg00809775	0.12	20.61	1.02e-53	0.133
rs112172847	cg00809775	0.12	20.61	1.02e-53	0.133
rs807022	cg02932204	0.23	20.6	1.07e-53	0.243
rs1073109	cg08899523	0.22	20.59	1.16e-53	0.217
rs7094002	cg17371064	-0.2	-20.59	1.19e-53	0.226
rs3824613	cg15590007	0.13	20.57	1.37e-53	0.137
rs28395865	cg15590007	0.14	20.57	1.38e-53	0.138
rs55840159	cg13661397	-0.14	-20.56	1.41e-53	0.148
rs72779837	cg13661397	-0.14	-20.56	1.41e-53	0.148
rs6601965	cg13661397	-0.14	-20.56	1.41e-53	0.148
rs28451239	cg13661397	-0.14	-20.56	1.41e-53	0.148
rs7073877	cg13661397	-0.14	-20.56	1.41e-53	0.148
rs11253172	cg13661397	-0.14	-20.56	1.41e-53	0.148
rs11253176	cg13661397	-0.14	-20.56	1.41e-53	0.148
rs7078942	cg13661397	-0.14	-20.56	1.41e-53	0.148
rs11253180	cg13661397	-0.14	-20.56	1.41e-53	0.148
rs7076318	cg13661397	-0.14	-20.56	1.41e-53	0.148
rs12570751	cg13661397	-0.14	-20.56	1.41e-53	0.148
rs56676146	cg13661397	-0.14	-20.56	1.41e-53	0.148
rs7097341	cg13661397	-0.14	-20.56	1.41e-53	0.148
rs2902639	cg26865853	-0.09	-20.56	1.41e-53	0.089
rs10793585	cg03955764	-0.13	-20.56	1.42e-53	0.131
rs3780898	cg15590007	0.14	20.55	1.58e-53	0.138
rs1780091	cg14240646	0.23	20.54	1.66e-53	0.224
rs11239497	cg15590007	0.13	20.53	1.75e-53	0.137
rs4500437	cg03955764	-0.13	-20.53	1.79e-53	0.131
rs4511242	cg03955764	-0.13	-20.53	1.79e-53	0.131
rs12413346	cg03955764	-0.13	-20.53	1.79e-53	0.131
rs284619	cg07899896	0.19	20.52	1.89e-53	0.217
rs419515	cg07899896	0.19	20.52	1.89e-53	0.217
rs284617	cg07899896	0.19	20.52	1.89e-53	0.217
rs2993986	cg11671940	0.21	20.51	2.09e-53	0.207
rs4752256	cg07733920	-0.12	-20.51	2.09e-53	0.128
rs1924034	cg07733920	-0.12	-20.51	2.09e-53	0.128
rs4929792	cg13563815	0.16	20.51	2.12e-53	0.162
rs2780667	cg14240646	0.23	20.51	2.12e-53	0.223
rs7072508	cg16653991	0.22	20.5	2.13e-53	0.216
rs7918550	cg16653991	0.22	20.5	2.13e-53	0.216
rs7905593	cg16653991	0.22	20.5	2.13e-53	0.216
rs11594976	cg16653991	0.22	20.5	2.13e-53	0.216
rs28688373	cg16653991	0.22	20.5	2.13e-53	0.216
rs7475717	cg13661397	-0.14	-20.5	2.21e-53	0.146
rs7068437	cg17371064	-0.2	-20.5	2.23e-53	0.226
rs2277264	cg00809775	0.12	20.49	2.29e-53	0.133
rs12764190	cg13562929	-0.16	-20.49	2.41e-53	0.172
rs35223321	cg26865853	-0.09	-20.48	2.46e-53	0.088
rs4752256	cg19990189	-0.12	-20.45	3.09e-53	0.131
rs1924034	cg19990189	-0.12	-20.45	3.09e-53	0.131
rs28607366	cg24443494	0.19	20.44	3.37e-53	0.189
rs7072508	cg06791446	-0.18	-20.44	3.39e-53	0.174
rs7918550	cg06791446	-0.18	-20.44	3.39e-53	0.174
rs7905593	cg06791446	-0.18	-20.44	3.39e-53	0.174
rs11594976	cg06791446	-0.18	-20.44	3.39e-53	0.174
rs28688373	cg06791446	-0.18	-20.44	3.39e-53	0.174
rs10885620	cg07733920	-0.12	-20.42	4.03e-53	0.133
rs2780675	cg14240646	0.23	20.41	4.2e-53	0.223
rs1328602	cg14240646	0.23	20.4	4.41e-53	0.225
rs7084967	cg07899896	0.19	20.4	4.41e-53	0.211
rs11191841	cg26865853	-0.09	-20.39	4.79e-53	0.089
rs7100920	cg26865853	-0.09	-20.39	4.87e-53	0.088
rs2436569	cg07899896	0.19	20.38	5.26e-53	0.213
rs2436566	cg07899896	0.19	20.38	5.26e-53	0.213
rs7902280	cg07044115	-0.23	-20.38	5.4e-53	0.228
rs7908527	cg07899896	0.19	20.37	5.58e-53	0.213
rs4508155	cg07899896	0.19	20.37	5.58e-53	0.213
rs10509099	cg07899896	0.19	20.37	5.58e-53	0.213
rs5030903	cg14418922	-0.19	-20.37	5.75e-53	0.187
rs10904532	cg26679884	0.38	20.37	5.8e-53	0.444
rs2298075	cg07570687	0.13	20.36	5.84e-53	0.123
rs2790447	cg11671940	0.21	20.35	6.57e-53	0.206
rs2993989	cg11671940	0.21	20.35	6.57e-53	0.206
rs2185293	cg11671940	0.21	20.35	6.57e-53	0.206
rs2807732	cg11671940	0.21	20.35	6.57e-53	0.206
rs2790436	cg11671940	0.21	20.35	6.57e-53	0.206
rs2807730	cg11671940	0.21	20.35	6.57e-53	0.206
rs2993991	cg11671940	0.21	20.35	6.57e-53	0.206
rs2998283	cg11671940	0.21	20.35	6.57e-53	0.206
rs2993992	cg11671940	0.21	20.35	6.57e-53	0.206
rs2491251	cg11671940	0.21	20.35	6.57e-53	0.206
rs2807728	cg11671940	0.21	20.35	6.57e-53	0.206
rs1339704	cg11671940	0.21	20.35	6.57e-53	0.206
rs3008365	cg06550582	0.09	20.34	6.84e-53	0.095
rs141938292	cg07899896	0.19	20.34	7.05e-53	0.211
rs112140735	cg00809775	0.12	20.33	7.64e-53	0.132
rs4962405	cg00809775	0.12	20.33	7.64e-53	0.132
rs1380555	cg07899896	0.19	20.31	8.39e-53	0.214
rs758585	cg07733920	-0.12	-20.31	8.69e-53	0.127
rs4453185	cg03955764	-0.13	-20.3	9.13e-53	0.132
rs2783433	cg07158320	-0.23	-20.29	9.78e-53	0.225
rs2842085	cg18768136	-0.15	-20.29	1.02e-52	0.161
rs2842086	cg18768136	-0.15	-20.29	1.02e-52	0.161
rs5784065	cg11671940	0.21	20.27	1.15e-52	0.205
rs2783432	cg07158320	-0.22	-20.26	1.24e-52	0.225
rs2440866	cg07899896	0.19	20.24	1.38e-52	0.212
rs10795039	cg17371064	-0.19	-20.24	1.46e-52	0.225
rs10904490	cg13661397	-0.14	-20.24	1.47e-52	0.147
rs7476837	cg13661397	-0.14	-20.24	1.47e-52	0.147
rs6601960	cg13661397	-0.14	-20.24	1.47e-52	0.147
rs1073109	cg07044115	-0.23	-20.23	1.48e-52	0.23
rs10905133	cg13562929	-0.16	-20.23	1.56e-52	0.171
rs7901687	cg07899896	0.19	20.21	1.78e-52	0.214
rs7097903	cg14812524	0.16	20.2	1.9e-52	0.138
rs10887024	cg20835665	0.06	20.2	1.92e-52	0.067
rs12761999	cg08240913	0.15	20.19	2.11e-52	0.187
rs7906411	cg20867662	0.14	20.19	2.11e-52	0.146
rs1227063	cg00541421	-0.13	-20.18	2.21e-52	0.132
rs7083111	cg15590007	0.13	20.17	2.31e-52	0.144
rs11009926	cg20867662	0.14	20.17	2.36e-52	0.146
rs7099563	cg20867662	0.14	20.17	2.36e-52	0.146
rs61840962	cg20867662	0.14	20.17	2.36e-52	0.146
rs2921273	cg07899896	0.19	20.17	2.42e-52	0.214
rs12767947	cg13562929	-0.16	-20.16	2.51e-52	0.171
rs7072508	cg19650936	0.13	20.16	2.57e-52	0.122
rs7918550	cg19650936	0.13	20.16	2.57e-52	0.122
rs7905593	cg19650936	0.13	20.16	2.57e-52	0.122
rs11594976	cg19650936	0.13	20.16	2.57e-52	0.122
rs28688373	cg19650936	0.13	20.16	2.57e-52	0.122
rs2805921	cg14418922	-0.19	-20.15	2.66e-52	0.184
rs7072508	cg25052156	-0.17	-20.15	2.68e-52	0.165
rs7918550	cg25052156	-0.17	-20.15	2.68e-52	0.165
rs7905593	cg25052156	-0.17	-20.15	2.68e-52	0.165
rs11594976	cg25052156	-0.17	-20.15	2.68e-52	0.165
rs28688373	cg25052156	-0.17	-20.15	2.68e-52	0.165
rs2842084	cg18768136	-0.15	-20.14	2.94e-52	0.159
rs55759483	cg07733920	0.12	20.13	3.04e-52	0.128
rs7908237	cg07733920	0.12	20.13	3.04e-52	0.128
rs7902280	cg16653991	0.22	20.13	3.08e-52	0.215
rs7915211	cg20867662	0.14	20.13	3.13e-52	0.145
rs1035796	cg14812524	0.15	20.12	3.29e-52	0.141
rs945796	cg17371064	-0.2	-20.12	3.36e-52	0.216
rs10904503	cg13661397	-0.14	-20.12	3.39e-52	0.148
rs10795036	cg17371064	-0.2	-20.12	3.4e-52	0.229
rs72779830	cg13661397	-0.14	-20.1	3.84e-52	0.149
rs12571693	cg13661397	-0.14	-20.1	3.84e-52	0.149
rs2452512	cg07899896	0.19	20.1	4.04e-52	0.209
rs9417141	cg20867662	0.14	20.09	4.1e-52	0.147
rs9415990	cg00541421	-0.13	-20.08	4.38e-52	0.135
rs9329321	cg13661397	-0.14	-20.08	4.62e-52	0.148
rs2795093;rs386742401	cg07158320	-0.22	-20.07	4.91e-52	0.214
rs2245070	cg08240913	0.15	20.05	5.49e-52	0.184
rs1144510	cg14240646	0.23	20.05	5.52e-52	0.227
rs2452522	cg07899896	0.19	20.05	5.59e-52	0.209
rs1107030	cg08240913	0.15	20.04	5.95e-52	0.185
rs12413276	cg02305391	0.18	20.03	6.68e-52	0.19
rs4752560	cg08899523	0.22	20.01	7.22e-52	0.214
rs1856591	cg03955764	-0.13	-20.01	7.54e-52	0.131
rs4752562	cg08899523	0.22	20.01	7.55e-52	0.216
rs13377143	cg07899896	0.19	20	7.82e-52	0.211
rs59747214	cg07899896	0.19	20	7.82e-52	0.211
rs1563824	cg07899896	0.19	20	7.82e-52	0.211
rs7905293	cg07899896	0.19	20	7.82e-52	0.211
rs1073109	cg06791446	-0.18	-19.99	8.35e-52	0.175
rs1073109	cg16653991	0.22	19.99	8.43e-52	0.216
rs4313486	cg14939821	0.15	19.99	8.77e-52	0.164
rs10829375	cg14939821	0.15	19.99	8.77e-52	0.164
rs2489403	cg14939821	0.15	19.99	8.77e-52	0.164
rs2483857	cg14939821	0.15	19.99	8.77e-52	0.164
rs2483858	cg14939821	0.15	19.99	8.77e-52	0.164
rs16935722	cg20867662	0.14	19.99	8.82e-52	0.146
rs2153333	cg03955764	-0.13	-19.98	9.23e-52	0.13
rs4068926	cg03955764	-0.13	-19.98	9.23e-52	0.13
rs4379782	cg03955764	-0.13	-19.98	9.23e-52	0.13
rs3862873	cg03955764	-0.13	-19.98	9.23e-52	0.13
rs3927771	cg03955764	-0.13	-19.98	9.23e-52	0.13
rs61852603	cg03955764	-0.13	-19.98	9.37e-52	0.129
rs9418117	cg20867662	0.14	19.97	1.03e-51	0.146
rs10905132	cg13562929	-0.16	-19.95	1.12e-51	0.168
rs3850671	cg26865853	-0.09	-19.95	1.18e-51	0.089
rs7902280	cg19650936	0.13	19.94	1.25e-51	0.122
rs7902280	cg06791446	-0.18	-19.93	1.31e-51	0.173
rs3862874	cg03955764	-0.13	-19.92	1.4e-51	0.13
rs4285830	cg03955764	-0.13	-19.91	1.49e-51	0.131
rs10793586	cg03955764	-0.13	-19.91	1.5e-51	0.13
rs7072375	cg03955764	-0.13	-19.91	1.5e-51	0.13
rs4120893	cg03955764	-0.13	-19.91	1.5e-51	0.13
rs10882698	cg19681037	0.15	19.91	1.55e-51	0.149
rs10903414	cg02305391	0.17	19.9	1.66e-51	0.175
rs1073109	cg19650936	0.13	19.9	1.71e-51	0.123
rs12267435	cg07899896	0.19	19.89	1.84e-51	0.21
rs284621	cg07899896	0.19	19.88	1.85e-51	0.212
rs5006854	cg03955764	-0.13	-19.88	1.88e-51	0.13
rs5006853	cg03955764	-0.13	-19.88	1.88e-51	0.13
rs5006852	cg03955764	-0.13	-19.88	1.88e-51	0.13
rs4472887	cg03955764	-0.13	-19.88	1.88e-51	0.13
rs7474730	cg13661397	-0.14	-19.88	1.88e-51	0.147
rs2251968	cg07899896	0.19	19.87	2e-51	0.214
rs2814448	cg27555617	-0.05	-19.87	2.05e-51	0.048
rs7895830	cg19990189	-0.12	-19.86	2.19e-51	0.131
rs1073109	cg25052156	-0.17	-19.84	2.47e-51	0.165
rs3008366	cg06550582	0.09	19.84	2.59e-51	0.093
rs2694766	cg08240913	0.15	19.82	3.02e-51	0.184
rs11190569	cg07570687	0.13	19.82	3.03e-51	0.123
rs9420782	cg07570687	0.12	19.81	3.21e-51	0.119
rs9420785	cg07570687	0.12	19.81	3.21e-51	0.119
rs4919466	cg07570687	0.12	19.81	3.21e-51	0.119
rs10904496	cg13661397	-0.14	-19.8	3.43e-51	0.145
rs10904497	cg13661397	-0.14	-19.8	3.43e-51	0.145
rs11190664	cg26540559	0.06	19.8	3.5e-51	0.056
rs758585	cg19990189	-0.12	-19.79	3.68e-51	0.129
rs12573103	cg26865853	-0.09	-19.78	3.86e-51	0.088
rs7071102	cg07899896	0.19	19.78	4.07e-51	0.209
rs4068923	cg03955764	-0.13	-19.77	4.29e-51	0.13
rs10904507	cg13661397	-0.14	-19.76	4.47e-51	0.147
rs1250600	cg18737081	0.11	19.76	4.53e-51	0.106
rs2694763	cg08240913	0.15	19.75	4.83e-51	0.184
rs7895912	cg13661397	-0.14	-19.75	4.86e-51	0.145
rs11253158	cg13661397	-0.14	-19.75	4.86e-51	0.145
rs2790448	cg11671940	0.22	19.74	5.1e-51	0.211
rs2807734	cg11671940	0.22	19.74	5.1e-51	0.211
rs2095901	cg11671940	0.22	19.74	5.1e-51	0.211
rs2993990	cg11671940	0.22	19.74	5.1e-51	0.211
rs2486639	cg11671940	0.22	19.74	5.1e-51	0.211
rs998362	cg11671940	0.22	19.74	5.1e-51	0.211
rs17554925	cg05119883	0.23	19.74	5.19e-51	0.219
rs4751958	cg08240913	0.15	19.73	5.67e-51	0.186
rs1831187	cg23656959	0.1	19.72	6.08e-51	0.107
rs1539089	cg07570687	0.12	19.72	6.11e-51	0.119
rs2807763	cg11671940	0.22	19.7	6.95e-51	0.21
rs7076936	cg14623216	0.07	19.7	7.14e-51	0.077
rs7895830	cg07733920	-0.12	-19.69	7.48e-51	0.127
rs56150414	cg20848186	0.11	19.68	7.88e-51	0.116
rs6593482	cg20848186	0.11	19.68	8.42e-51	0.116
rs67008983	cg20848186	0.11	19.68	8.42e-51	0.116
rs55787481	cg20848186	0.11	19.68	8.42e-51	0.116
rs12783095	cg20848186	0.11	19.68	8.42e-51	0.116
rs17157728	cg20848186	0.11	19.68	8.42e-51	0.116
rs17157733	cg20848186	0.11	19.68	8.42e-51	0.116
rs151239879	cg20848186	0.11	19.67	8.69e-51	0.117
rs150423942	cg20848186	0.11	19.67	8.69e-51	0.117
rs75129876	cg20848186	0.11	19.67	8.69e-51	0.117
rs77200598	cg20848186	0.11	19.67	8.69e-51	0.117
rs55717607	cg20848186	0.11	19.67	8.69e-51	0.117
rs11239491	cg20848186	0.11	19.67	8.69e-51	0.117
rs7084793	cg20848186	0.11	19.67	8.69e-51	0.117
rs7921503	cg20848186	0.11	19.67	8.69e-51	0.117
rs7909740	cg20848186	0.11	19.67	8.69e-51	0.117
rs7909768	cg20848186	0.11	19.67	8.69e-51	0.117
rs7913488	cg20848186	0.11	19.67	8.69e-51	0.117
rs67491417	cg20848186	0.11	19.67	8.69e-51	0.117
rs6413416	cg20848186	0.11	19.67	8.69e-51	0.117
rs4986832	cg20848186	0.11	19.67	8.69e-51	0.117
rs7913948	cg20848186	0.11	19.67	8.69e-51	0.117
rs12762303	cg20848186	0.11	19.67	8.69e-51	0.117
rs78137087	cg20848186	0.11	19.67	8.69e-51	0.117
rs72561472	cg20848186	0.11	19.67	8.69e-51	0.117
rs4987106	cg20848186	0.11	19.67	8.69e-51	0.117
rs111528152	cg20848186	0.11	19.67	8.69e-51	0.117
rs12763738	cg20848186	0.11	19.67	8.69e-51	0.117
rs66489870	cg20848186	0.11	19.67	8.69e-51	0.117
rs71494775	cg20848186	0.11	19.67	8.69e-51	0.117
rs1864414	cg20848186	0.11	19.67	8.69e-51	0.117
rs1864413	cg20848186	0.11	19.67	8.69e-51	0.117
rs1864412	cg20848186	0.11	19.67	8.69e-51	0.117
rs7073550	cg07570687	0.13	19.67	8.72e-51	0.126
rs7920217;rs71485762	cg26865853	-0.09	-19.67	8.94e-51	0.088
rs6588753	cg13563815	0.16	19.67	8.99e-51	0.164
rs11599597	cg17371064	-0.2	-19.66	9.18e-51	0.212
rs7093951	cg13185377	0.18	19.65	1.03e-50	0.201
rs67354918	cg13185377	0.18	19.65	1.03e-50	0.201
rs7902280	cg25052156	-0.17	-19.65	1.03e-50	0.163
rs11197593	cg08240913	0.15	19.64	1.07e-50	0.186
rs7072508	cg02210151	-0.16	-19.63	1.13e-50	0.157
rs7918550	cg02210151	-0.16	-19.63	1.13e-50	0.157
rs7905593	cg02210151	-0.16	-19.63	1.13e-50	0.157
rs11594976	cg02210151	-0.16	-19.63	1.13e-50	0.157
rs28688373	cg02210151	-0.16	-19.63	1.13e-50	0.157
rs11197587	cg08240913	0.15	19.63	1.15e-50	0.184
rs7100363	cg06279296	0.2	19.63	1.17e-50	0.248
rs7095816	cg07733920	-0.12	-19.6	1.42e-50	0.126
rs2780681	cg14240646	0.23	19.6	1.43e-50	0.22
rs2243922	cg14240646	0.23	19.6	1.43e-50	0.22
rs2446718	cg07899896	0.19	19.6	1.48e-50	0.213
rs2446722	cg07899896	0.19	19.6	1.48e-50	0.213
rs1459990	cg07899896	0.19	19.6	1.48e-50	0.213
rs111634827	cg03955764	-0.13	-19.59	1.6e-50	0.127
rs9419897	cg07570687	0.12	19.59	1.61e-50	0.119
rs10776595	cg14436939	-0.15	-19.58	1.65e-50	0.146
rs2082108	cg20848186	0.11	19.58	1.68e-50	0.117
rs12354994	cg20848186	0.11	19.58	1.68e-50	0.117
rs12354742	cg20848186	0.11	19.58	1.68e-50	0.117
rs11517281	cg20848186	0.11	19.58	1.68e-50	0.117
rs12359299	cg20848186	0.11	19.58	1.68e-50	0.117
rs11523408	cg20848186	0.11	19.58	1.68e-50	0.117
rs807023	cg02932204	0.22	19.58	1.69e-50	0.228
rs1073109	cg02210151	-0.16	-19.57	1.81e-50	0.158
rs11253163	cg13185377	0.18	19.57	1.81e-50	0.201
rs73369330	cg00809775	0.12	19.57	1.86e-50	0.131
rs3008363	cg06550582	0.09	19.57	1.87e-50	0.094
rs944909	cg23656959	0.1	19.56	1.92e-50	0.106
rs1831188	cg23656959	0.1	19.56	1.96e-50	0.108
rs2185402	cg19572051	-0.22	-19.56	2e-50	0.2
rs2452503	cg07899896	0.19	19.55	2.02e-50	0.21
rs2446720	cg07899896	0.19	19.55	2.02e-50	0.21
rs145657016	cg07570687	0.12	19.55	2.08e-50	0.118
rs61852602	cg03955764	-0.13	-19.54	2.17e-50	0.127
rs12267488	cg03955764	-0.13	-19.54	2.17e-50	0.127
rs7072508	cg10379346	-0.22	-19.54	2.25e-50	0.216
rs7918550	cg10379346	-0.22	-19.54	2.25e-50	0.216
rs7905593	cg10379346	-0.22	-19.54	2.25e-50	0.216
rs11594976	cg10379346	-0.22	-19.54	2.25e-50	0.216
rs28688373	cg10379346	-0.22	-19.54	2.25e-50	0.216
rs2800396	cg23656959	0.1	19.53	2.37e-50	0.106
rs4919461	cg07570687	0.12	19.53	2.42e-50	0.122
rs12359302	cg20848186	0.11	19.53	2.49e-50	0.117
rs10776596	cg14436939	-0.15	-19.52	2.6e-50	0.145
rs17663387	cg07733920	0.12	19.51	2.77e-50	0.125
rs11819372	cg07733920	0.12	19.51	2.77e-50	0.126
rs10885618	cg07733920	0.12	19.51	2.77e-50	0.126
rs11101290	cg14436939	-0.15	-19.51	2.86e-50	0.145
rs58217739	cg13185377	0.19	19.5	3.11e-50	0.201
rs7095799	cg03955764	-0.13	-19.49	3.16e-50	0.129
rs10751371	cg03955764	-0.13	-19.49	3.24e-50	0.131
rs7922848	cg03955764	-0.13	-19.47	3.72e-50	0.128
rs1961333	cg03955764	-0.13	-19.47	3.72e-50	0.128
rs1961334	cg03955764	-0.13	-19.47	3.72e-50	0.128
rs7084047	cg03955764	-0.13	-19.47	3.72e-50	0.128
rs7084452	cg03955764	-0.13	-19.47	3.72e-50	0.128
rs4113135	cg03955764	-0.13	-19.47	3.72e-50	0.128
rs867631	cg14436939	-0.15	-19.47	3.8e-50	0.142
rs1919708	cg14436939	-0.15	-19.47	3.8e-50	0.142
rs2691154	cg13398715	-0.15	-19.47	3.81e-50	0.168
rs2800397	cg23656959	0.1	19.46	3.98e-50	0.106
rs2780673	cg23656959	0.1	19.46	3.98e-50	0.106
rs11598804	cg00809775	0.12	19.46	4.09e-50	0.13
rs9415035	cg00541421	-0.13	-19.45	4.18e-50	0.133
rs7089608	cg03955764	-0.13	-19.45	4.22e-50	0.127
rs10900166	cg03955764	-0.13	-19.45	4.22e-50	0.127
rs2386638	cg14623216	0.07	19.45	4.36e-50	0.076
rs2386637	cg14623216	0.07	19.45	4.36e-50	0.076
rs2892076	cg14623216	0.07	19.45	4.36e-50	0.076
rs2892075	cg14623216	0.07	19.45	4.36e-50	0.076
rs3763698	cg14623216	0.07	19.45	4.36e-50	0.076
rs7914425	cg13185377	0.18	19.44	4.56e-50	0.203
rs7917823	cg13185377	0.18	19.44	4.56e-50	0.203
rs7917949	cg13185377	0.18	19.44	4.56e-50	0.203
rs7074740	cg13185377	0.18	19.44	4.56e-50	0.203
rs734371	cg14436939	-0.15	-19.44	4.59e-50	0.142
rs2590381	cg14436939	-0.15	-19.44	4.59e-50	0.142
rs2463960	cg14436939	-0.15	-19.44	4.59e-50	0.142
rs2800405	cg23656959	0.1	19.44	4.61e-50	0.106
rs2800401	cg23656959	0.1	19.44	4.61e-50	0.106
rs2800398	cg23656959	0.1	19.44	4.61e-50	0.106
rs2780671	cg23656959	0.1	19.44	4.61e-50	0.106
rs17531317	cg23656959	0.1	19.44	4.61e-50	0.106
rs372705329;rs17531324;rs370944053	cg23656959	0.1	19.44	4.61e-50	0.106
rs2800395	cg23656959	0.1	19.44	4.61e-50	0.106
rs1780090	cg23656959	0.1	19.44	4.61e-50	0.106
rs1780093	cg23656959	0.1	19.44	4.61e-50	0.106
rs2797079	cg23656959	0.1	19.44	4.61e-50	0.106
rs2800393	cg23656959	0.1	19.44	4.61e-50	0.106
rs2800391	cg23656959	0.1	19.44	4.61e-50	0.106
rs7917207	cg23656959	0.1	19.44	4.61e-50	0.106
rs7914155	cg23656959	0.1	19.44	4.61e-50	0.106
rs2780665	cg23656959	0.1	19.44	4.61e-50	0.106
rs2770201	cg23656959	0.1	19.44	4.61e-50	0.106
rs2770200	cg23656959	0.1	19.44	4.61e-50	0.106
rs4274153	cg07570687	0.12	19.44	4.66e-50	0.118
rs58828402	cg13185377	0.18	19.44	4.7e-50	0.201
rs2073338	cg01727419	-0.09	-19.44	4.72e-50	0.086
rs1076972	cg08240913	0.15	19.43	4.84e-50	0.184
rs12766388	cg08240913	0.15	19.43	4.84e-50	0.184
rs2802362	cg06073814	0.14	19.43	4.87e-50	0.146
rs3827680	cg14436939	-0.15	-19.42	5.43e-50	0.142
rs7904142	cg14436939	-0.15	-19.42	5.43e-50	0.142
rs9888128	cg14436939	-0.15	-19.42	5.43e-50	0.142
rs11101317	cg14436939	-0.15	-19.42	5.43e-50	0.142
rs11101318	cg14436939	-0.15	-19.42	5.43e-50	0.142
rs2800394	cg23656959	0.1	19.41	5.83e-50	0.106
rs1265166	cg01727419	-0.09	-19.41	5.86e-50	0.091
rs7909296	cg20867662	0.14	19.41	5.94e-50	0.147
rs12570113	cg13661397	-0.14	-19.39	6.72e-50	0.147
rs2393537	cg07899896	0.18	19.38	7.12e-50	0.217
rs75474563	cg14623216	0.07	19.37	7.54e-50	0.076
rs11598434	cg14436939	-0.15	-19.37	7.85e-50	0.143
rs4948947	cg03955764	-0.12	-19.36	8.43e-50	0.129
rs12255632	cg13185377	0.18	19.35	8.88e-50	0.201
rs2683599	cg00809775	0.12	19.35	8.98e-50	0.133
rs56178329	cg14623216	0.07	19.35	9.2e-50	0.077
rs3814203	cg14623216	0.07	19.35	9.2e-50	0.077
rs3814202	cg14623216	0.07	19.35	9.2e-50	0.077
rs5019339	cg14623216	0.07	19.35	9.2e-50	0.077
rs5019340	cg14623216	0.07	19.35	9.2e-50	0.077
rs1417823	cg07570687	0.12	19.34	9.61e-50	0.117
rs2807743	cg11671940	0.2	19.33	1.04e-49	0.2
rs1548085	cg07899896	0.19	19.33	1.05e-49	0.213
rs2489374	cg23656959	0.1	19.32	1.08e-49	0.105
rs55759483	cg19990189	0.12	19.32	1.08e-49	0.129
rs7908237	cg19990189	0.12	19.32	1.08e-49	0.129
rs7923693	cg07733920	0.12	19.32	1.1e-49	0.125
rs10883944	cg01727419	-0.08	-19.32	1.13e-49	0.088
rs73581620	cg13185377	0.18	19.3	1.27e-49	0.203
rs113210208	cg13185377	0.18	19.3	1.27e-49	0.203
rs7912391	cg13185377	0.18	19.3	1.27e-49	0.203
rs1563822	cg23272287	0.19	19.3	1.31e-49	0.221
rs12252088	cg13185377	0.18	19.29	1.37e-49	0.203
rs2780680	cg23656959	0.1	19.28	1.48e-49	0.106
rs2780679	cg23656959	0.1	19.28	1.48e-49	0.106
rs2185402	cg06406458	-0.32	-19.27	1.62e-49	0.295
rs17531310	cg23656959	0.1	19.26	1.68e-49	0.106
rs55986122	cg20848186	0.11	19.26	1.68e-49	0.118
rs2099170	cg20848186	0.11	19.26	1.68e-49	0.118
rs12266646	cg13185377	0.19	19.26	1.72e-49	0.203
rs35906360	cg20848186	0.11	19.26	1.74e-49	0.118
rs2452499	cg07899896	0.19	19.26	1.77e-49	0.209
rs7092842	cg13661397	-0.14	-19.25	1.91e-49	0.144
rs3255	cg13661397	-0.14	-19.25	1.91e-49	0.144
rs7076375	cg23027329	-0.09	-19.24	1.93e-49	0.099
rs2698761	cg14436939	-0.15	-19.24	1.95e-49	0.139
rs2245518	cg17402294	0.09	19.24	1.96e-49	0.086
rs17663387	cg19990189	0.12	19.24	2.06e-49	0.127
rs11819372	cg19990189	0.12	19.24	2.06e-49	0.128
rs10885618	cg19990189	0.12	19.24	2.06e-49	0.128
rs672785	cg04701817	0.1	19.22	2.27e-49	0.103
rs284624	cg23272287	0.19	19.22	2.36e-49	0.222
rs284622	cg23272287	0.19	19.22	2.36e-49	0.222
rs7902280	cg02210151	-0.16	-19.21	2.49e-49	0.156
rs11253185	cg13661397	-0.14	-19.21	2.49e-49	0.144
rs14327	cg18768136	-0.15	-19.21	2.54e-49	0.159
rs2802369	cg06073814	0.15	19.2	2.63e-49	0.157
rs2279337	cg25423573	0.14	19.2	2.68e-49	0.143
rs1073109	cg10379346	-0.22	-19.2	2.76e-49	0.217
rs11253182	cg13661397	-0.14	-19.2	2.77e-49	0.149
rs4962401	cg00809775	0.12	19.17	3.3e-49	0.127
rs10763601	cg07899896	0.19	19.17	3.41e-49	0.213
rs7097037	cg14623216	0.07	19.17	3.44e-49	0.077
rs7085382	cg14623216	0.07	19.17	3.44e-49	0.077
rs7916800	cg07899896	0.19	19.16	3.57e-49	0.208
rs4752562	cg16653991	0.22	19.15	3.84e-49	0.214
rs2452505	cg07899896	0.19	19.14	4e-49	0.208
rs8428	cg14436939	-0.15	-19.13	4.53e-49	0.142
rs4752560	cg16653991	0.22	19.13	4.56e-49	0.212
rs10793584	cg03955764	-0.13	-19.12	4.92e-49	0.13
rs11001618	cg09553982	-0.16	-19.12	4.96e-49	0.146
rs4881439	cg13661397	-0.14	-19.11	5.04e-49	0.144
rs11101320	cg14436939	-0.15	-19.11	5.13e-49	0.142
rs7086275	cg14436939	-0.15	-19.11	5.13e-49	0.142
rs6601964	cg13661397	-0.14	-19.11	5.25e-49	0.144
rs12572605	cg13661397	-0.14	-19.11	5.25e-49	0.144
rs7091237	cg13661397	-0.14	-19.11	5.25e-49	0.144
rs10904499	cg13661397	-0.14	-19.11	5.25e-49	0.144
rs10904500	cg13661397	-0.14	-19.11	5.25e-49	0.144
rs72779844	cg13661397	-0.14	-19.11	5.25e-49	0.144
rs72779845	cg13661397	-0.14	-19.11	5.25e-49	0.144
rs11253177	cg13661397	-0.14	-19.11	5.25e-49	0.144
rs7090012	cg13661397	-0.14	-19.11	5.25e-49	0.144
rs11239492	cg20848186	0.11	19.1	5.37e-49	0.115
rs7912637;rs386743330	cg07678448	-0.13	-19.1	5.38e-49	0.133
rs11255057	cg13562929	-0.16	-19.1	5.41e-49	0.168
rs1345103	cg14436939	-0.15	-19.1	5.73e-49	0.14
rs2698766	cg14436939	-0.15	-19.1	5.73e-49	0.14
rs666429	cg04701817	0.1	19.08	6.61e-49	0.105
rs1658418	cg12342675	-0.14	-19.08	6.64e-49	0.148
rs1890737	cg07678448	-0.13	-19.07	7.04e-49	0.135
rs12781451	cg07889765	-0.15	-19.06	7.19e-49	0.168
rs2153300	cg11671940	0.21	19.06	7.39e-49	0.211
rs7923693	cg19990189	0.12	19.06	7.53e-49	0.127
rs4073219	cg24443494	0.16	19.06	7.53e-49	0.161
rs10826274	cg07899896	0.19	19.05	7.74e-49	0.21
rs12777531	cg13661397	-0.14	-19.05	7.78e-49	0.145
rs6537561	cg14436939	-0.15	-19.05	7.81e-49	0.14
rs11187869	cg07889765	-0.15	-19.05	8.16e-49	0.168
rs1903890	cg04701817	0.1	19.04	8.76e-49	0.106
rs7474688	cg12342675	-0.14	-19.04	8.88e-49	0.146
rs630051	cg04701817	0.1	19.03	9.02e-49	0.104
rs2386635	cg14623216	0.07	19.03	9.25e-49	0.078
rs2616636	cg04701817	0.1	19.02	9.67e-49	0.106
rs2616637	cg04701817	0.1	19.02	9.74e-49	0.105
rs11598095	cg00809775	0.12	19.02	9.94e-49	0.13
rs2885755	cg00809775	0.12	19.02	9.94e-49	0.13
rs11245367	cg00809775	0.12	19.02	9.94e-49	0.13
rs584353	cg04701817	0.1	19.02	1.01e-48	0.104
rs12356109	cg20848186	0.11	19.02	1.01e-48	0.115
rs11511619	cg20848186	0.11	19.02	1.01e-48	0.115
rs10883922	cg01727419	-0.09	-19.01	1.06e-48	0.091
rs7901699	cg07899896	0.19	19.01	1.07e-48	0.209
rs765173	cg07733920	-0.12	-19.01	1.09e-48	0.127
rs11006414	cg07899896	0.19	19.01	1.1e-48	0.21
rs7902280	cg10379346	-0.22	-19	1.14e-48	0.214
rs11598614	cg25423573	0.14	19	1.16e-48	0.143
rs11001617	cg09553982	-0.16	-18.98	1.31e-48	0.153
rs2178285	cg07629776	0.15	18.96	1.49e-48	0.146
rs7078822	cg20848186	0.11	18.96	1.52e-48	0.115
rs7093687	cg20848186	0.11	18.96	1.52e-48	0.115
rs7081004	cg20848186	0.11	18.96	1.52e-48	0.115
rs898372	cg23272287	0.19	18.96	1.56e-48	0.223
rs7088117	cg07899896	0.19	18.95	1.64e-48	0.208
rs10904491	cg13661397	-0.13	-18.95	1.65e-48	0.135
rs7478007	cg13661397	-0.13	-18.95	1.65e-48	0.135
rs765173	cg19990189	-0.12	-18.94	1.76e-48	0.13
rs4244340	cg24179445	-0.11	-18.93	1.92e-48	0.112
rs4987105	cg20848186	0.11	18.92	2e-48	0.115
rs2694765	cg08240913	0.15	18.92	2.06e-48	0.181
rs7089805	cg07899896	0.19	18.92	2.15e-48	0.206
rs2998286	cg11671940	0.2	18.91	2.19e-48	0.207
rs2263102	cg14436939	-0.15	-18.89	2.59e-48	0.139
rs284619	cg23272287	0.19	18.87	2.96e-48	0.222
rs419515	cg23272287	0.19	18.87	2.96e-48	0.222
rs284617	cg23272287	0.19	18.87	2.96e-48	0.222
rs7095816	cg19990189	-0.12	-18.87	3e-48	0.127
rs11002535	cg17067139	0.11	18.86	3.2e-48	0.119
rs3845267	cg03955764	-0.13	-18.86	3.27e-48	0.127
rs7072352	cg03955764	-0.13	-18.86	3.28e-48	0.127
rs12413391	cg03955764	-0.13	-18.85	3.53e-48	0.127
rs7098306	cg14458563	0.16	18.84	3.78e-48	0.161
rs7098634	cg14458563	0.16	18.84	3.78e-48	0.161
rs2780670	cg23656959	0.1	18.82	4.19e-48	0.105
rs11001616	cg09553982	-0.16	-18.81	4.58e-48	0.154
rs807019	cg17339543	0.02	18.81	4.72e-48	0.023
rs2446721	cg23272287	0.19	18.8	4.85e-48	0.22
rs1903252	cg23272287	0.19	18.8	4.85e-48	0.22
rs1903253	cg23272287	0.19	18.8	4.85e-48	0.22
rs1824428	cg23272287	0.19	18.8	4.85e-48	0.22
rs2446719	cg23272287	0.19	18.8	4.85e-48	0.22
rs9630122	cg13661397	-0.13	-18.8	5.11e-48	0.134
rs75251745	cg07570687	0.12	18.79	5.22e-48	0.116
rs11197594	cg08240913	0.15	18.79	5.29e-48	0.185
rs143694936	cg14458563	0.16	18.79	5.38e-48	0.16
rs10795274	cg13661397	-0.13	-18.77	6.04e-48	0.135
rs4747595	cg23656959	0.1	18.76	6.89e-48	0.105
rs2457851	cg27572370	0.14	18.75	7.05e-48	0.154
rs2457850	cg27572370	0.14	18.75	7.05e-48	0.154
rs4752322	cg07733920	-0.12	-18.75	7.14e-48	0.126
rs10827415	cg20867662	0.13	18.75	7.21e-48	0.142
rs7923244	cg20867662	0.13	18.75	7.21e-48	0.142
rs11009923	cg20867662	0.13	18.74	7.48e-48	0.14
rs1380555	cg23272287	0.19	18.74	7.77e-48	0.22
rs10827418	cg20867662	0.13	18.74	7.94e-48	0.141
rs10827419	cg20867662	0.13	18.74	7.94e-48	0.141
rs796848080;rs10823364;rs61400072	cg23339629	0.08	18.73	8.14e-48	0.072
rs4282892	cg14458563	0.15	18.73	8.21e-48	0.16
rs7083284	cg14458563	0.15	18.73	8.21e-48	0.16
rs7079869	cg14458563	0.15	18.73	8.21e-48	0.16
rs2457849	cg27572370	0.13	18.71	9.39e-48	0.153
rs10827417	cg20867662	0.13	18.71	9.55e-48	0.142
rs10796014	cg14458563	0.16	18.71	9.68e-48	0.16
rs10906295	cg14458563	0.16	18.71	9.68e-48	0.16
rs185000304	cg14458563	0.16	18.71	9.68e-48	0.16
rs139330109	cg14458563	0.16	18.71	9.68e-48	0.16
rs2892074	cg14623216	0.07	18.71	9.91e-48	0.078
rs11558740	cg07889765	-0.15	-18.71	9.96e-48	0.168
rs1890735	cg07678448	-0.13	-18.7	1.03e-47	0.135
rs1831188	cg14240646	0.24	18.69	1.1e-47	0.228
rs7905578	cg07899896	0.18	18.68	1.17e-47	0.211
rs12413018	cg07899896	0.18	18.68	1.17e-47	0.211
rs61840961	cg20867662	0.13	18.68	1.2e-47	0.14
rs28483914	cg20867662	0.13	18.68	1.2e-47	0.14
rs9665365	cg20848186	0.11	18.68	1.2e-47	0.122
rs10904036	cg17371064	-0.2	-18.68	1.25e-47	0.214
rs1831187	cg14240646	0.24	18.67	1.27e-47	0.226
rs4644560	cg23339629	0.08	18.67	1.29e-47	0.072
rs4369300	cg23339629	0.08	18.67	1.29e-47	0.072
rs6601969	cg13661397	-0.13	-18.67	1.31e-47	0.135
rs1649033	cg12342675	-0.14	-18.66	1.43e-47	0.144
rs1649032	cg12342675	-0.14	-18.66	1.43e-47	0.144
rs1649030	cg12342675	-0.14	-18.66	1.43e-47	0.144
rs1658497	cg12342675	-0.14	-18.66	1.43e-47	0.144
rs1658496	cg12342675	-0.14	-18.66	1.43e-47	0.144
rs7913021	cg13185377	0.18	18.65	1.51e-47	0.198
rs1418540	cg00146027	-0.15	-18.65	1.52e-47	0.152
rs2393448	cg12342675	-0.14	-18.65	1.52e-47	0.146
rs1649043	cg12342675	-0.14	-18.65	1.54e-47	0.146
rs3001717	cg12342675	-0.14	-18.65	1.54e-47	0.146
rs2577391	cg12342675	-0.14	-18.65	1.54e-47	0.146
rs1658422	cg12342675	-0.14	-18.65	1.54e-47	0.146
rs1658421	cg12342675	-0.14	-18.65	1.54e-47	0.146
rs1427223	cg12342675	-0.14	-18.64	1.58e-47	0.145
rs1427222	cg12342675	-0.14	-18.64	1.58e-47	0.145
rs1896243	cg12342675	-0.14	-18.64	1.59e-47	0.144
rs10764001	cg20867662	0.13	18.64	1.59e-47	0.139
rs10827420	cg20867662	0.13	18.64	1.59e-47	0.139
rs9417142	cg20867662	0.13	18.64	1.59e-47	0.139
rs1459996	cg07899896	0.19	18.64	1.61e-47	0.206
rs200774329	cg12342675	-0.14	-18.64	1.61e-47	0.144
rs149675351	cg12342675	-0.14	-18.64	1.61e-47	0.144
rs145448523	cg12342675	-0.14	-18.64	1.61e-47	0.144
rs1658439	cg12342675	-0.14	-18.64	1.61e-47	0.145
rs1649046	cg12342675	-0.14	-18.64	1.61e-47	0.145
rs1658435	cg12342675	-0.14	-18.64	1.61e-47	0.145
rs12264028	cg12342675	-0.14	-18.64	1.61e-47	0.144
rs11239485	cg20848186	0.11	18.64	1.63e-47	0.118
rs1649026	cg12342675	-0.14	-18.64	1.63e-47	0.144
rs11006170	cg12342675	-0.14	-18.64	1.64e-47	0.143
rs7094882	cg12342675	-0.14	-18.64	1.64e-47	0.143
rs7098326	cg12342675	-0.14	-18.64	1.64e-47	0.143
rs7098329	cg12342675	-0.14	-18.64	1.64e-47	0.143
rs2170779	cg12342675	-0.14	-18.64	1.64e-47	0.143
rs1365741	cg12342675	-0.14	-18.64	1.64e-47	0.143
rs1365740	cg12342675	-0.14	-18.64	1.64e-47	0.143
rs12248958	cg12342675	-0.14	-18.64	1.64e-47	0.143
rs12242287	cg12342675	-0.14	-18.64	1.64e-47	0.143
rs1427196	cg12342675	-0.14	-18.64	1.64e-47	0.143
rs1427195	cg12342675	-0.14	-18.64	1.64e-47	0.143
rs1649031	cg12342675	-0.14	-18.64	1.64e-47	0.143
rs1658494	cg12342675	-0.14	-18.64	1.64e-47	0.143
rs1649028	cg12342675	-0.14	-18.64	1.64e-47	0.143
rs1649027	cg12342675	-0.14	-18.64	1.64e-47	0.143
rs1658492	cg12342675	-0.14	-18.64	1.64e-47	0.143
rs1658491	cg12342675	-0.14	-18.64	1.64e-47	0.143
rs57396248	cg12342675	-0.14	-18.64	1.64e-47	0.143
rs1632584	cg12342675	-0.14	-18.64	1.64e-47	0.143
rs1649024	cg12342675	-0.14	-18.64	1.64e-47	0.143
rs1630150	cg12342675	-0.14	-18.64	1.64e-47	0.143
rs28862452	cg12342675	-0.14	-18.64	1.64e-47	0.143
rs145131851	cg12342675	-0.14	-18.64	1.64e-47	0.143
rs140448017	cg12342675	-0.14	-18.64	1.64e-47	0.143
rs7392584	cg12342675	-0.14	-18.64	1.64e-47	0.143
rs7394395	cg12342675	-0.14	-18.64	1.64e-47	0.143
rs7392561	cg12342675	-0.14	-18.64	1.64e-47	0.143
rs7393610	cg12342675	-0.14	-18.64	1.64e-47	0.143
rs7393810	cg12342675	-0.14	-18.64	1.64e-47	0.143
rs7393811	cg12342675	-0.14	-18.64	1.64e-47	0.143
rs147608004	cg12342675	-0.14	-18.64	1.64e-47	0.143
rs145828461	cg12342675	-0.14	-18.64	1.64e-47	0.143
rs1649023	cg12342675	-0.14	-18.64	1.64e-47	0.143
rs1649022	cg12342675	-0.14	-18.64	1.64e-47	0.143
rs1658489	cg12342675	-0.14	-18.64	1.64e-47	0.143
rs1649021	cg12342675	-0.14	-18.64	1.64e-47	0.143
rs2577393	cg12342675	-0.14	-18.64	1.64e-47	0.143
rs9416704	cg12342675	-0.14	-18.64	1.64e-47	0.143
rs9416705	cg12342675	-0.14	-18.64	1.64e-47	0.143
rs1658488	cg12342675	-0.14	-18.64	1.64e-47	0.143
rs1346300	cg12342675	-0.14	-18.64	1.64e-47	0.143
rs1658486	cg12342675	-0.14	-18.64	1.64e-47	0.143
rs1649019	cg12342675	-0.14	-18.64	1.64e-47	0.143
rs1649018	cg12342675	-0.14	-18.64	1.64e-47	0.143
rs1658485	cg12342675	-0.14	-18.64	1.64e-47	0.143
rs1649017	cg12342675	-0.14	-18.64	1.64e-47	0.143
rs1649016	cg12342675	-0.14	-18.64	1.64e-47	0.143
rs1658484	cg12342675	-0.14	-18.64	1.64e-47	0.143
rs1658483	cg12342675	-0.14	-18.64	1.64e-47	0.143
rs1649015	cg12342675	-0.14	-18.64	1.64e-47	0.143
rs1658481	cg12342675	-0.14	-18.64	1.64e-47	0.143
rs1658478	cg12342675	-0.14	-18.64	1.64e-47	0.143
rs1658477	cg12342675	-0.14	-18.64	1.64e-47	0.143
rs1649089	cg12342675	-0.14	-18.64	1.64e-47	0.143
rs1427224	cg12342675	-0.14	-18.64	1.64e-47	0.143
rs1593678	cg12342675	-0.14	-18.64	1.64e-47	0.143
rs1593677	cg12342675	-0.14	-18.64	1.64e-47	0.143
rs1593675	cg12342675	-0.14	-18.64	1.64e-47	0.143
rs1593674	cg12342675	-0.14	-18.64	1.64e-47	0.143
rs1658471	cg12342675	-0.14	-18.64	1.64e-47	0.143
rs1649085	cg12342675	-0.14	-18.64	1.64e-47	0.143
rs1649084	cg12342675	-0.14	-18.64	1.64e-47	0.143
rs1658470	cg12342675	-0.14	-18.64	1.64e-47	0.143
rs1658468	cg12342675	-0.14	-18.64	1.64e-47	0.143
rs1649080	cg12342675	-0.14	-18.64	1.64e-47	0.143
rs1649077	cg12342675	-0.14	-18.64	1.64e-47	0.143
rs1649076	cg12342675	-0.14	-18.64	1.64e-47	0.143
rs1593673	cg12342675	-0.14	-18.64	1.64e-47	0.143
rs1579394	cg12342675	-0.14	-18.64	1.64e-47	0.143
rs1626532	cg12342675	-0.14	-18.64	1.64e-47	0.143
rs1658467	cg12342675	-0.14	-18.64	1.64e-47	0.143
rs1593671	cg12342675	-0.14	-18.64	1.64e-47	0.143
rs1582827	cg12342675	-0.14	-18.64	1.64e-47	0.143
rs1582826	cg12342675	-0.14	-18.64	1.64e-47	0.143
rs1649072	cg12342675	-0.14	-18.64	1.64e-47	0.143
rs1658463	cg12342675	-0.14	-18.64	1.64e-47	0.143
rs1658462	cg12342675	-0.14	-18.64	1.64e-47	0.143
rs1303970	cg12342675	-0.14	-18.64	1.64e-47	0.143
rs1303968	cg12342675	-0.14	-18.64	1.64e-47	0.143
rs1593670	cg12342675	-0.14	-18.64	1.64e-47	0.143
rs1658458	cg12342675	-0.14	-18.64	1.64e-47	0.143
rs1658457	cg12342675	-0.14	-18.64	1.64e-47	0.143
rs1649069	cg12342675	-0.14	-18.64	1.64e-47	0.143
rs1649067	cg12342675	-0.14	-18.64	1.64e-47	0.143
rs1649066	cg12342675	-0.14	-18.64	1.64e-47	0.143
rs1658455	cg12342675	-0.14	-18.64	1.64e-47	0.143
rs1649065	cg12342675	-0.14	-18.64	1.64e-47	0.143
rs1658454	cg12342675	-0.14	-18.64	1.64e-47	0.143
rs1614258	cg12342675	-0.14	-18.64	1.64e-47	0.143
rs1649063	cg12342675	-0.14	-18.64	1.64e-47	0.143
rs1649062	cg12342675	-0.14	-18.64	1.64e-47	0.143
rs1658453	cg12342675	-0.14	-18.64	1.64e-47	0.143
rs1649061	cg12342675	-0.14	-18.64	1.64e-47	0.143
rs1658452	cg12342675	-0.14	-18.64	1.64e-47	0.143
rs1658447	cg12342675	-0.14	-18.64	1.64e-47	0.143
rs1658446	cg12342675	-0.14	-18.64	1.64e-47	0.143
rs2438182	cg12342675	-0.14	-18.64	1.64e-47	0.143
rs1658443	cg12342675	-0.14	-18.64	1.64e-47	0.143
rs1649058	cg12342675	-0.14	-18.64	1.64e-47	0.143
rs1649057	cg12342675	-0.14	-18.64	1.64e-47	0.143
rs1158212	cg12342675	-0.14	-18.64	1.64e-47	0.143
rs1658417	cg12342675	-0.14	-18.64	1.64e-47	0.146
rs1658459	cg12342675	-0.14	-18.64	1.65e-47	0.144
rs1621227	cg12342675	-0.14	-18.63	1.69e-47	0.145
rs1620404	cg12342675	-0.14	-18.63	1.69e-47	0.145
rs1626606	cg12342675	-0.14	-18.63	1.69e-47	0.145
rs1649042	cg12342675	-0.14	-18.63	1.69e-47	0.145
rs1649041	cg12342675	-0.14	-18.63	1.69e-47	0.145
rs1658432	cg12342675	-0.14	-18.63	1.69e-47	0.145
rs2917949	cg12342675	-0.14	-18.63	1.69e-47	0.145
rs2577392	cg12342675	-0.14	-18.63	1.69e-47	0.145
rs2842083	cg12342675	-0.14	-18.63	1.69e-47	0.145
rs1658431	cg12342675	-0.14	-18.63	1.69e-47	0.145
rs1649040	cg12342675	-0.14	-18.63	1.69e-47	0.145
rs1649039	cg12342675	-0.14	-18.63	1.69e-47	0.145
rs1658429	cg12342675	-0.14	-18.63	1.69e-47	0.145
rs1649038	cg12342675	-0.14	-18.63	1.69e-47	0.145
rs1658428	cg12342675	-0.14	-18.63	1.69e-47	0.145
rs1649037	cg12342675	-0.14	-18.63	1.69e-47	0.145
rs1658427	cg12342675	-0.14	-18.63	1.69e-47	0.145
rs1658426	cg12342675	-0.14	-18.63	1.69e-47	0.145
rs1658424	cg12342675	-0.14	-18.63	1.69e-47	0.145
rs1649036	cg12342675	-0.14	-18.63	1.69e-47	0.145
rs1658420	cg12342675	-0.14	-18.63	1.69e-47	0.145
rs1649035	cg12342675	-0.14	-18.63	1.69e-47	0.145
rs1658419	cg12342675	-0.14	-18.63	1.74e-47	0.146
rs1649082	cg12342675	-0.14	-18.63	1.76e-47	0.145
rs1649081	cg12342675	-0.14	-18.63	1.76e-47	0.145
rs827321	cg13398715	-0.15	-18.63	1.76e-47	0.164
rs7074778	cg12342675	-0.14	-18.63	1.79e-47	0.144
rs7072034	cg00146027	-0.15	-18.62	1.87e-47	0.152
rs1649051	cg12342675	-0.14	-18.62	1.87e-47	0.144
rs1658441	cg12342675	-0.14	-18.62	1.87e-47	0.144
rs1658440	cg12342675	-0.14	-18.62	1.87e-47	0.144
rs1649049	cg12342675	-0.14	-18.62	1.87e-47	0.144
rs11815274	cg12342675	-0.14	-18.61	1.98e-47	0.146
rs1658480	cg12342675	-0.14	-18.61	2.04e-47	0.145
rs1658479	cg12342675	-0.14	-18.61	2.04e-47	0.145
rs7087361	cg17067139	0.11	18.61	2.07e-47	0.12
rs4979970	cg17067139	0.11	18.61	2.07e-47	0.12
rs7920428	cg17067139	0.11	18.61	2.07e-47	0.12
rs2007833	cg17067139	0.11	18.61	2.07e-47	0.12
rs12355942	cg07570687	0.12	18.6	2.2e-47	0.122
rs11009173	cg00146027	-0.14	-18.59	2.4e-47	0.154
rs10823361	cg23339629	0.08	18.58	2.47e-47	0.072
rs1549797	cg23339629	0.08	18.58	2.47e-47	0.072
rs2393534	cg23272287	0.19	18.58	2.57e-47	0.216
rs10763599	cg23272287	0.19	18.58	2.57e-47	0.216
rs10824607	cg17067139	0.11	18.57	2.66e-47	0.123
rs9417143	cg20867662	0.13	18.57	2.73e-47	0.14
rs10884001	cg01780345	-0.23	-18.56	2.85e-47	0.203
rs2698767	cg14436939	-0.15	-18.56	2.96e-47	0.139
rs9418115	cg20867662	0.13	18.56	2.99e-47	0.141
rs9417140	cg20867662	0.13	18.56	2.99e-47	0.141
rs1459995	cg07899896	0.19	18.54	3.29e-47	0.208
rs2783434	cg07158320	-0.22	-18.54	3.42e-47	0.221
rs1749851	cg18737081	-0.11	-18.54	3.44e-47	0.111
rs56180358	cg20848186	0.11	18.54	3.48e-47	0.117
rs4752322	cg19990189	-0.12	-18.53	3.49e-47	0.129
rs7893218	cg13185377	0.18	18.53	3.56e-47	0.205
rs7908527	cg23272287	0.19	18.53	3.59e-47	0.216
rs4508155	cg23272287	0.19	18.53	3.59e-47	0.216
rs10509099	cg23272287	0.19	18.53	3.59e-47	0.216
rs10824606	cg17067139	0.11	18.53	3.61e-47	0.123
rs4752562	cg07044115	-0.23	-18.52	3.81e-47	0.224
rs10732789	cg24179445	-0.11	-18.52	3.91e-47	0.111
rs9418116	cg20867662	0.13	18.52	3.95e-47	0.14
rs2446575	cg27572370	0.14	18.52	3.97e-47	0.154
rs11511620	cg20848186	0.11	18.52	4.03e-47	0.117
rs35039157	cg06406458	-0.31	-18.51	4.17e-47	0.286
rs9418810	cg06406458	-0.31	-18.51	4.17e-47	0.286
rs9418811	cg06406458	-0.31	-18.51	4.17e-47	0.286
rs2066161	cg06406458	-0.31	-18.51	4.17e-47	0.286
rs2066160	cg06406458	-0.31	-18.51	4.17e-47	0.286
rs2386633	cg14623216	0.07	18.51	4.23e-47	0.077
rs7097037	cg11519256	0.02	18.51	4.25e-47	0.029
rs7085382	cg11519256	0.02	18.51	4.25e-47	0.029
rs7908665	cg07733920	-0.12	-18.51	4.31e-47	0.127
rs4751475	cg19572051	-0.21	-18.5	4.68e-47	0.193
rs9418816	cg19572051	-0.21	-18.5	4.68e-47	0.193
rs2447633	cg04701817	0.1	18.49	4.73e-47	0.106
rs998334	cg04701817	0.1	18.49	4.73e-47	0.106
rs7908665	cg19990189	-0.12	-18.49	4.81e-47	0.13
rs7897782	cg24179445	-0.11	-18.49	4.84e-47	0.111
rs4403743	cg24179445	-0.11	-18.49	4.89e-47	0.11
rs6584392	cg24179445	-0.11	-18.49	4.89e-47	0.11
rs6584393	cg24179445	-0.11	-18.49	4.89e-47	0.11
rs6584394	cg24179445	-0.11	-18.49	4.89e-47	0.11
rs6584395	cg24179445	-0.11	-18.49	4.89e-47	0.11
rs4917907	cg24179445	-0.11	-18.49	4.89e-47	0.11
rs4277047	cg24179445	-0.11	-18.49	4.89e-47	0.11
rs4509693	cg24179445	-0.11	-18.49	4.89e-47	0.11
rs10748797	cg24179445	-0.11	-18.49	4.89e-47	0.11
rs4917908	cg24179445	-0.11	-18.49	4.89e-47	0.11
rs2446574	cg27572370	0.14	18.49	4.94e-47	0.153
rs17424847	cg13562929	-0.16	-18.49	4.95e-47	0.168
rs1649059	cg12342675	-0.14	-18.49	5e-47	0.143
rs2420936	cg08195415	0.13	18.49	5.03e-47	0.115
rs2386635	cg11519256	0.02	18.48	5.23e-47	0.03
rs11006413	cg07899896	0.18	18.47	5.76e-47	0.21
rs1556383	cg14812524	0.14	18.46	5.86e-47	0.138
rs55896038	cg08195415	0.13	18.46	5.91e-47	0.115
rs7091556	cg08195415	0.13	18.46	5.91e-47	0.115
rs368317053;rs67946394;rs1649088;rs67222408;rs551217760;rs796804623	cg12342675	-0.14	-18.46	5.95e-47	0.143
rs7915348	cg17371064	-0.2	-18.45	6.37e-47	0.216
rs4752560	cg07044115	-0.23	-18.45	6.71e-47	0.221
rs1343005	cg07629776	0.14	18.44	6.99e-47	0.144
rs35039157	cg19572051	-0.21	-18.44	7.03e-47	0.192
rs9418810	cg19572051	-0.21	-18.44	7.03e-47	0.192
rs9418811	cg19572051	-0.21	-18.44	7.03e-47	0.192
rs2066161	cg19572051	-0.21	-18.44	7.03e-47	0.192
rs2066160	cg19572051	-0.21	-18.44	7.03e-47	0.192
rs3814204	cg14623216	0.07	18.44	7.16e-47	0.077
rs1896246	cg12342675	-0.14	-18.44	7.25e-47	0.143
rs1896245	cg12342675	-0.14	-18.44	7.25e-47	0.143
rs73576221	cg13185377	0.18	18.43	7.32e-47	0.198
rs1658434	cg12342675	-0.14	-18.43	7.46e-47	0.147
rs816651	cg23027329	-0.09	-18.43	7.52e-47	0.098
rs898373	cg07899896	0.18	18.43	7.62e-47	0.208
rs11819163	cg07899896	0.18	18.43	7.62e-47	0.208
rs10901827	cg00809775	0.12	18.43	7.62e-47	0.127
rs11597901	cg00809775	0.12	18.43	7.62e-47	0.127
rs2440866	cg23272287	0.19	18.43	7.65e-47	0.216
rs2800396	cg14240646	0.24	18.43	7.83e-47	0.224
rs606682	cg04701817	0.09	18.42	8.05e-47	0.105
rs1658456	cg12342675	-0.14	-18.42	8.16e-47	0.143
rs7901687	cg23272287	0.19	18.42	8.44e-47	0.218
rs4752560	cg19650936	0.12	18.41	8.78e-47	0.119
rs7084967	cg23272287	0.19	18.41	8.94e-47	0.214
rs1649091	cg12342675	-0.14	-18.41	8.99e-47	0.142
rs4752562	cg19650936	0.12	18.4	9.52e-47	0.12
rs11257391	cg21322043	0.32	18.39	1.02e-46	0.355
rs1658438	cg12342675	-0.14	-18.38	1.07e-46	0.144
rs17663446	cg07356745	0.29	18.38	1.1e-46	0.279
rs61281038	cg20867662	0.13	18.37	1.15e-46	0.14
rs942794	cg06073814	0.14	18.37	1.18e-46	0.152
rs3862877	cg03955764	-0.12	-18.37	1.19e-46	0.127
rs7923293	cg03955764	-0.12	-18.37	1.19e-46	0.127
rs9423897	cg14623216	0.07	18.36	1.31e-46	0.077
rs4948655	cg03955764	-0.12	-18.35	1.33e-46	0.126
rs11200264	cg09943237	0.05	18.35	1.34e-46	0.056
rs7392591	cg12342675	-0.14	-18.35	1.36e-46	0.143
rs10762385	cg20418394	0.14	18.35	1.36e-46	0.143
rs11253064	cg13185377	0.18	18.35	1.38e-46	0.202
rs7907837	cg07733920	-0.12	-18.34	1.44e-46	0.126
rs141938292	cg23272287	0.19	18.34	1.51e-46	0.214
rs2452512	cg23272287	0.19	18.34	1.52e-46	0.212
rs1278329	cg15342452	0.1	18.33	1.53e-46	0.098
rs2800405	cg14240646	0.24	18.33	1.53e-46	0.224
rs2800401	cg14240646	0.24	18.33	1.53e-46	0.224
rs2800398	cg14240646	0.24	18.33	1.53e-46	0.224
rs2780671	cg14240646	0.24	18.33	1.53e-46	0.224
rs17531317	cg14240646	0.24	18.33	1.53e-46	0.224
rs372705329;rs17531324;rs370944053	cg14240646	0.24	18.33	1.53e-46	0.224
rs2800395	cg14240646	0.24	18.33	1.53e-46	0.224
rs1780090	cg14240646	0.24	18.33	1.53e-46	0.224
rs1780093	cg14240646	0.24	18.33	1.53e-46	0.224
rs2797079	cg14240646	0.24	18.33	1.53e-46	0.224
rs2800393	cg14240646	0.24	18.33	1.53e-46	0.224
rs2800391	cg14240646	0.24	18.33	1.53e-46	0.224
rs7917207	cg14240646	0.24	18.33	1.53e-46	0.224
rs7914155	cg14240646	0.24	18.33	1.53e-46	0.224
rs2780665	cg14240646	0.24	18.33	1.53e-46	0.224
rs2770201	cg14240646	0.24	18.33	1.53e-46	0.224
rs2770200	cg14240646	0.24	18.33	1.53e-46	0.224
rs55978138	cg20848186	0.11	18.33	1.58e-46	0.116
rs1649068	cg12342675	-0.14	-18.33	1.59e-46	0.142
rs2251968	cg23272287	0.19	18.33	1.63e-46	0.219
rs2577382	cg08240913	0.14	18.32	1.67e-46	0.178
rs6593460	cg03955764	-0.12	-18.32	1.68e-46	0.126
rs7907374	cg03955764	-0.12	-18.32	1.68e-46	0.126
rs11253156	cg13661397	-0.14	-18.32	1.74e-46	0.143
rs2797860	cg07629776	0.14	18.32	1.75e-46	0.147
rs1649025	cg12342675	-0.14	-18.31	1.83e-46	0.143
rs1658490	cg12342675	-0.14	-18.31	1.83e-46	0.143
rs2386630	cg14623216	0.07	18.31	1.84e-46	0.077
rs2386629	cg14623216	0.07	18.31	1.84e-46	0.077
rs2386627	cg14623216	0.07	18.31	1.84e-46	0.077
rs2436569	cg23272287	0.19	18.31	1.86e-46	0.215
rs2436566	cg23272287	0.19	18.31	1.86e-46	0.215
rs3827681	cg14436939	-0.14	-18.31	1.9e-46	0.138
rs34422972	cg05119883	0.21	18.3	2.01e-46	0.227
rs10824686	cg05119883	0.21	18.3	2.01e-46	0.227
rs2802370	cg06073814	0.14	18.29	2.05e-46	0.147
rs7080530	cg23027329	-0.09	-18.29	2.13e-46	0.099
rs10823552	cg20418394	0.14	18.29	2.15e-46	0.143
rs1658493	cg12342675	-0.14	-18.28	2.24e-46	0.143
rs4751475	cg06406458	-0.31	-18.28	2.26e-46	0.285
rs9418816	cg06406458	-0.31	-18.28	2.26e-46	0.285
rs6601957	cg13661397	-0.14	-18.27	2.39e-46	0.142
rs12267435	cg23272287	0.19	18.27	2.41e-46	0.214
rs4919486	cg24179445	-0.11	-18.26	2.56e-46	0.11
rs7914169	cg24179445	-0.11	-18.26	2.56e-46	0.11
rs10736999	cg13661397	-0.13	-18.26	2.64e-46	0.132
rs10904506	cg13661397	-0.13	-18.26	2.64e-46	0.132
rs944909	cg14240646	0.24	18.25	2.78e-46	0.225
rs1658460	cg12342675	-0.14	-18.25	2.94e-46	0.143
rs10904035	cg17371064	-0.2	-18.24	3.1e-46	0.213
rs945798	cg17371064	-0.2	-18.22	3.57e-46	0.213
rs4752562	cg25052156	-0.16	-18.21	3.75e-46	0.162
rs4752560	cg25052156	-0.16	-18.2	4.28e-46	0.16
rs2783614	cg07158320	-0.23	-18.19	4.29e-46	0.238
rs7099997	cg07245057	0.22	18.19	4.32e-46	0.249
rs7101132	cg07245057	0.22	18.19	4.32e-46	0.249
rs10901803	cg00809775	0.11	18.19	4.42e-46	0.123
rs4934658	cg20867662	0.14	18.18	4.67e-46	0.145
rs4934666	cg20867662	0.14	18.18	4.67e-46	0.145
rs4934667	cg20867662	0.14	18.18	4.67e-46	0.145
rs55965812	cg20848186	0.11	18.18	4.74e-46	0.115
rs12354712	cg20848186	0.11	18.18	4.74e-46	0.115
rs10796012	cg14458563	0.15	18.18	4.78e-46	0.16
rs10796013	cg14458563	0.15	18.18	4.78e-46	0.16
rs2790766	cg06073814	0.14	18.17	5e-46	0.146
rs12570087	cg08240913	0.15	18.17	5.13e-46	0.182
rs16935717	cg20867662	0.13	18.16	5.4e-46	0.139
rs1549799	cg23339629	0.08	18.16	5.57e-46	0.071
rs7071102	cg23272287	0.19	18.16	5.71e-46	0.213
rs2452518	cg07899896	0.19	18.15	5.75e-46	0.206
rs7089977	cg00146027	-0.14	-18.15	5.81e-46	0.153
rs55813610	cg23771949	-0.14	-18.14	6.22e-46	0.143
rs4546989	cg14623216	0.07	18.14	6.24e-46	0.076
rs11258391	cg14623216	0.07	18.14	6.24e-46	0.076
rs4592326	cg14623216	0.07	18.14	6.24e-46	0.076
rs9423896	cg14623216	0.07	18.14	6.24e-46	0.076
rs7090709	cg13661397	-0.13	-18.14	6.42e-46	0.131
rs77538812	cg14458563	0.15	18.14	6.49e-46	0.159
rs12259731	cg20673407	-0.32	-18.13	6.74e-46	0.328
rs11009925	cg20867662	0.13	18.13	7.08e-46	0.138
rs10752012	cg13661397	-0.13	-18.12	7.18e-46	0.131
rs11791	cg13661397	-0.13	-18.12	7.18e-46	0.131
rs2452522	cg23272287	0.19	18.12	7.28e-46	0.212
rs2489374	cg14240646	0.24	18.11	8.1e-46	0.222
rs4948949	cg03955764	-0.12	-18.11	8.16e-46	0.125
rs4948950	cg03955764	-0.12	-18.11	8.16e-46	0.125
rs7080176	cg20867662	0.13	18.11	8.17e-46	0.139
rs7081164	cg11124823	-0.07	-18.11	8.18e-46	0.072
rs7092394	cg11124823	-0.07	-18.11	8.18e-46	0.072
rs12219032	cg11124823	-0.07	-18.11	8.18e-46	0.072
rs12217395	cg11124823	-0.07	-18.11	8.18e-46	0.072
rs12411782	cg11124823	-0.07	-18.11	8.18e-46	0.072
rs9418712	cg06406458	-0.3	-18.1	8.46e-46	0.279
rs11018215	cg06406458	-0.3	-18.1	8.46e-46	0.279
rs4751425	cg06406458	-0.3	-18.1	8.46e-46	0.279
rs10763999	cg20867662	0.14	18.09	9.14e-46	0.145
rs10764000	cg20867662	0.14	18.09	9.14e-46	0.145
rs2921273	cg23272287	0.19	18.09	9.18e-46	0.217
rs10762385	cg01464515	0.08	18.09	9.48e-46	0.083
rs9416703	cg12342675	-0.14	-18.09	9.52e-46	0.143
rs2892074	cg11519256	0.02	18.08	9.8e-46	0.03
rs2420936	cg25409939	0.13	18.08	9.83e-46	0.133
rs4582866	cg14458563	0.15	18.08	1.01e-45	0.159
rs7079763	cg14458563	0.15	18.08	1.01e-45	0.159
rs3824613	cg20848186	0.11	18.07	1.09e-45	0.113
rs10752282	cg14458563	0.15	18.06	1.15e-45	0.159
rs10752283	cg14458563	0.15	18.06	1.15e-45	0.159
rs10796016	cg14458563	0.15	18.06	1.15e-45	0.159
rs10906296	cg14458563	0.15	18.06	1.15e-45	0.159
rs2800394	cg14240646	0.24	18.06	1.18e-45	0.224
rs55896038	cg25409939	0.13	18.06	1.18e-45	0.133
rs7091556	cg25409939	0.13	18.06	1.18e-45	0.133
rs75344773	cg07356745	0.28	18.05	1.22e-45	0.278
rs56178329	cg11519256	0.02	18.05	1.25e-45	0.029
rs3814203	cg11519256	0.02	18.05	1.25e-45	0.029
rs3814202	cg11519256	0.02	18.05	1.25e-45	0.029
rs5019339	cg11519256	0.02	18.05	1.25e-45	0.029
rs5019340	cg11519256	0.02	18.05	1.25e-45	0.029
rs200200172	cg11124823	-0.07	-18.05	1.26e-45	0.072
rs28397083	cg11124823	-0.07	-18.05	1.26e-45	0.072
rs28433331	cg11124823	-0.07	-18.05	1.26e-45	0.072
rs2393537	cg23272287	0.19	18.05	1.28e-45	0.222
rs10885620	cg23260525	-0.1	-18.05	1.29e-45	0.105
rs7902970	cg21641816	-0.08	-18.04	1.32e-45	0.088
rs12776163	cg14418922	-0.17	-18.04	1.33e-45	0.174
rs10751373	cg03955764	-0.12	-18.04	1.33e-45	0.125
rs17531310	cg14240646	0.24	18.04	1.35e-45	0.225
rs7075610	cg17067139	0.11	18.04	1.37e-45	0.12
rs12411806	cg11124823	-0.07	-18.04	1.37e-45	0.072
rs72644229	cg11124823	-0.07	-18.03	1.43e-45	0.072
rs201032138	cg11124823	-0.07	-18.03	1.43e-45	0.072
rs202048864	cg11124823	-0.07	-18.03	1.43e-45	0.072
rs201880683	cg11124823	-0.07	-18.03	1.43e-45	0.072
rs10904037	cg17371064	-0.2	-18.03	1.44e-45	0.214
rs3814201	cg14623216	0.07	18.02	1.54e-45	0.075
rs2446721	cg25172127	0.13	18.02	1.56e-45	0.132
rs1903252	cg25172127	0.13	18.02	1.56e-45	0.132
rs1903253	cg25172127	0.13	18.02	1.56e-45	0.132
rs1824428	cg25172127	0.13	18.02	1.56e-45	0.132
rs2446719	cg25172127	0.13	18.02	1.56e-45	0.132
rs3855868	cg03955764	-0.12	-18.02	1.58e-45	0.127
rs7477459	cg07899896	0.18	18.02	1.59e-45	0.216
rs36147985	cg12342675	-0.14	-18.02	1.62e-45	0.142
rs36151114	cg12342675	-0.14	-18.02	1.62e-45	0.142
rs77582167	cg12342675	-0.14	-18.02	1.62e-45	0.142
rs9424181	cg14623216	0.07	18.01	1.64e-45	0.076
rs9423901	cg14623216	0.07	18.01	1.64e-45	0.076
rs7923640	cg14623216	0.07	18.01	1.64e-45	0.076
rs13377143	cg23272287	0.19	18.01	1.69e-45	0.213
rs59747214	cg23272287	0.19	18.01	1.69e-45	0.213
rs1563824	cg23272287	0.19	18.01	1.69e-45	0.213
rs7905293	cg23272287	0.19	18.01	1.69e-45	0.213
rs7895023	cg14418922	-0.17	-18.01	1.74e-45	0.176
rs73574227	cg13185377	0.18	18	1.79e-45	0.199
rs28496118	cg13563815	0.16	18	1.86e-45	0.157
rs10047354	cg07899896	0.19	17.99	1.9e-45	0.205
rs58238740	cg20848186	0.11	17.99	1.95e-45	0.112
rs3780894	cg20848186	0.11	17.99	1.95e-45	0.112
rs3780895	cg20848186	0.11	17.99	1.95e-45	0.112
rs2310776	cg20848186	0.11	17.99	1.95e-45	0.112
rs17157736	cg20848186	0.11	17.99	1.95e-45	0.112
rs7077891	cg20848186	0.11	17.99	1.95e-45	0.112
rs10823552	cg01464515	0.08	17.99	1.95e-45	0.083
rs3780896	cg20848186	0.11	17.98	2.05e-45	0.113
rs3780897	cg20848186	0.11	17.98	2.05e-45	0.113
rs2802371	cg06073814	0.14	17.98	2.05e-45	0.145
rs9418800	cg06406458	-0.29	-17.98	2.08e-45	0.279
rs113690919	cg23339629	0.08	17.98	2.13e-45	0.073
rs11009924	cg20867662	0.13	17.97	2.27e-45	0.137
rs10508813	cg20867662	0.14	17.96	2.36e-45	0.144
rs7895074	cg20867662	0.14	17.96	2.36e-45	0.144
rs7080443	cg03955764	-0.12	-17.96	2.36e-45	0.129
rs284621	cg23272287	0.18	17.95	2.58e-45	0.215
rs61865052	cg07356745	0.28	17.94	2.77e-45	0.274
rs56809248	cg07356745	0.28	17.94	2.77e-45	0.274
rs11202291	cg11124823	-0.07	-17.94	2.8e-45	0.073
rs16935716	cg20867662	0.14	17.94	2.8e-45	0.144
rs7907837	cg19990189	-0.12	-17.93	2.95e-45	0.128
rs4934016	cg07356745	0.28	17.93	3.04e-45	0.274
rs61866490	cg07356745	0.28	17.93	3.04e-45	0.274
rs61866493	cg07356745	0.28	17.93	3.04e-45	0.274
rs11201049	cg07356745	0.28	17.93	3.04e-45	0.274
rs11201050	cg07356745	0.28	17.93	3.04e-45	0.274
rs58620606	cg07356745	0.28	17.93	3.04e-45	0.274
rs61866495	cg07356745	0.28	17.93	3.04e-45	0.274
rs17719302	cg07356745	0.28	17.93	3.04e-45	0.274
rs61866506	cg07356745	0.28	17.93	3.04e-45	0.274
rs4934021	cg07356745	0.28	17.93	3.04e-45	0.274
rs200633850;rs373297316;rs544053516	cg20848186	0.11	17.91	3.44e-45	0.112
rs34738037	cg13562929	-0.16	-17.91	3.65e-45	0.169
rs12413778	cg20867662	0.14	17.9	3.74e-45	0.143
rs2178286	cg07629776	0.14	17.9	3.75e-45	0.149
rs6585266	cg04701817	0.09	17.9	3.75e-45	0.104
rs11202294	cg11124823	-0.07	-17.9	3.82e-45	0.072
rs1619284	cg12342675	-0.14	-17.9	3.87e-45	0.141
rs11200264	cg20835665	0.06	17.9	3.93e-45	0.064
rs7918409	cg06791446	0.17	17.89	4.03e-45	0.18
rs7076936	cg11519256	0.02	17.89	4.2e-45	0.028
rs60097806	cg21641816	-0.08	-17.89	4.22e-45	0.088
rs12774369	cg20848186	0.11	17.87	4.58e-45	0.113
rs60842538	cg20848186	0.11	17.87	4.77e-45	0.113
rs3780899	cg20848186	0.11	17.87	4.77e-45	0.113
rs1106478	cg06406458	-0.31	-17.87	4.77e-45	0.293
rs10823362	cg23339629	0.08	17.87	4.78e-45	0.073
rs9418712	cg19572051	-0.2	-17.86	4.91e-45	0.187
rs11018215	cg19572051	-0.2	-17.86	4.91e-45	0.187
rs4751425	cg19572051	-0.2	-17.86	4.91e-45	0.187
rs2446718	cg25172127	0.13	17.86	5.18e-45	0.131
rs2446722	cg25172127	0.13	17.86	5.18e-45	0.131
rs1459990	cg25172127	0.13	17.86	5.18e-45	0.131
rs112801076	cg00809775	0.12	17.85	5.35e-45	0.129
rs11595766	cg07356745	0.28	17.85	5.4e-45	0.274
rs11596916	cg07356745	0.28	17.85	5.4e-45	0.274
rs4752562	cg06791446	-0.17	-17.85	5.42e-45	0.169
rs10736973	cg17371064	-0.2	-17.84	5.89e-45	0.213
rs10786606	cg24179445	-0.11	-17.84	6.13e-45	0.109
rs2780680	cg14240646	0.24	17.83	6.4e-45	0.222
rs2780679	cg14240646	0.24	17.83	6.4e-45	0.222
rs9423902	cg14623216	0.07	17.83	6.57e-45	0.075
rs4752560	cg06791446	-0.17	-17.82	6.63e-45	0.167
rs11252919	cg13185377	0.17	17.82	6.93e-45	0.198
rs2386638	cg11519256	0.02	17.81	7.27e-45	0.028
rs2386637	cg11519256	0.02	17.81	7.27e-45	0.028
rs2892076	cg11519256	0.02	17.81	7.27e-45	0.028
rs2892075	cg11519256	0.02	17.81	7.27e-45	0.028
rs3763698	cg11519256	0.02	17.81	7.27e-45	0.028
rs10904488	cg13661397	-0.13	-17.8	8.13e-45	0.136
rs7918409	cg25052156	0.16	17.8	8.19e-45	0.17
rs7086123	cg20867662	0.13	17.79	8.36e-45	0.143
rs3814204	cg11519256	0.02	17.79	8.37e-45	0.029
rs987059	cg07899896	0.18	17.79	8.38e-45	0.2
rs1563822	cg25172127	0.12	17.79	8.83e-45	0.131
rs71481711	cg13562929	-0.16	-17.79	8.88e-45	0.171
rs186361595	cg07899896	0.19	17.78	9.11e-45	0.204
rs10900167	cg03955764	-0.12	-17.78	9.29e-45	0.126
rs9424166	cg14623216	0.07	17.78	9.53e-45	0.077
rs2446718	cg23272287	0.19	17.77	9.87e-45	0.217
rs2446722	cg23272287	0.19	17.77	9.87e-45	0.217
rs1459990	cg23272287	0.19	17.77	9.87e-45	0.217
rs28607366	cg13563815	0.16	17.76	1.05e-44	0.157
rs4630198	cg13661397	-0.14	-17.76	1.06e-44	0.14
rs4424575	cg13661397	-0.14	-17.76	1.06e-44	0.14
rs4948952	cg03955764	-0.12	-17.76	1.07e-44	0.125
rs10751372	cg03955764	-0.12	-17.76	1.07e-44	0.125
rs4747595	cg14240646	0.24	17.75	1.12e-44	0.223
rs7901687	cg25172127	0.13	17.75	1.12e-44	0.13
rs11252689	cg21641816	-0.08	-17.74	1.23e-44	0.088
rs2780670	cg14240646	0.23	17.74	1.24e-44	0.223
rs1548085	cg23272287	0.19	17.74	1.25e-44	0.218
rs1658469	cg12342675	-0.14	-17.73	1.34e-44	0.142
rs9418800	cg19572051	-0.2	-17.72	1.4e-44	0.187
rs672785	cg22923514	-0.09	-17.72	1.4e-44	0.095
rs1171602	cg12084908	0.13	17.72	1.43e-44	0.118
rs76394459	cg14623216	0.07	17.72	1.48e-44	0.077
rs1621280	cg23027329	-0.09	-17.72	1.48e-44	0.098
rs816650	cg13185377	0.17	17.71	1.51e-44	0.191
rs1171600	cg12084908	0.13	17.7	1.68e-44	0.116
rs3001713	cg12342675	-0.14	-17.7	1.7e-44	0.143
rs28426375	cg12342675	-0.14	-17.7	1.7e-44	0.143
rs3001714	cg12342675	-0.14	-17.7	1.7e-44	0.143
rs3001715	cg12342675	-0.14	-17.7	1.7e-44	0.143
rs1649034	cg12342675	-0.14	-17.7	1.7e-44	0.141
rs1896244	cg12342675	-0.14	-17.7	1.71e-44	0.141
rs7097576	cg12342675	-0.14	-17.7	1.71e-44	0.141
rs7098606	cg12342675	-0.14	-17.7	1.71e-44	0.141
rs1658495	cg12342675	-0.14	-17.7	1.71e-44	0.141
rs2917950	cg12342675	-0.14	-17.7	1.71e-44	0.141
rs1593672	cg12342675	-0.14	-17.7	1.71e-44	0.141
rs1649074	cg12342675	-0.14	-17.7	1.71e-44	0.141
rs1658451	cg12342675	-0.14	-17.7	1.71e-44	0.141
rs1658448	cg12342675	-0.14	-17.7	1.71e-44	0.141
rs1620186	cg12342675	-0.14	-17.7	1.71e-44	0.141
rs1658442	cg12342675	-0.14	-17.7	1.71e-44	0.141
rs1649055	cg12342675	-0.14	-17.7	1.71e-44	0.141
rs11190533	cg07570687	0.12	17.69	1.83e-44	0.121
rs11190534	cg07570687	0.12	17.69	1.83e-44	0.121
rs35508946	cg07570687	0.12	17.69	1.83e-44	0.121
rs76629555	cg07570687	0.12	17.69	1.83e-44	0.121
rs7076606	cg07570687	0.12	17.69	1.83e-44	0.121
rs2748434	cg26810230	-0.08	-17.68	1.87e-44	0.073
rs4752256	cg23260525	-0.09	-17.68	1.88e-44	0.1
rs1924034	cg23260525	-0.09	-17.68	1.88e-44	0.1
rs2181124	cg02220105	0.09	17.68	1.88e-44	0.096
rs11819634	cg02220105	0.09	17.68	1.96e-44	0.1
rs7918409	cg08899523	-0.2	-17.67	2.06e-44	0.222
rs76835764	cg07570687	0.12	17.66	2.21e-44	0.121
rs77769532	cg07570687	0.12	17.66	2.21e-44	0.121
rs1623568	cg12342675	-0.14	-17.66	2.23e-44	0.142
rs1621811	cg12342675	-0.14	-17.66	2.23e-44	0.142
rs1649048	cg12342675	-0.14	-17.66	2.23e-44	0.142
rs7477292;rs386740359	cg13661397	-0.14	-17.66	2.23e-44	0.14
rs200166301	cg11124823	-0.07	-17.66	2.27e-44	0.073
rs1177697	cg12084908	0.13	17.65	2.33e-44	0.114
rs4313486	cg08344422	0.14	17.65	2.36e-44	0.158
rs10829375	cg08344422	0.14	17.65	2.36e-44	0.158
rs2489403	cg08344422	0.14	17.65	2.36e-44	0.158
rs2483857	cg08344422	0.14	17.65	2.36e-44	0.158
rs2483858	cg08344422	0.14	17.65	2.36e-44	0.158
rs2806444	cg26810230	-0.08	-17.65	2.43e-44	0.074
rs370232405	cg20848186	0.11	17.64	2.62e-44	0.118
rs1649092	cg12342675	-0.14	-17.64	2.65e-44	0.142
rs1346301	cg12342675	-0.14	-17.64	2.67e-44	0.142
rs1427204	cg12342675	-0.14	-17.64	2.67e-44	0.142
rs1380555	cg25172127	0.12	17.63	2.76e-44	0.131
rs2504012	cg00146027	-0.14	-17.62	2.93e-44	0.151
rs2420936	cg22633036	-0.15	-17.62	2.93e-44	0.147
rs660101	cg04701817	0.09	17.62	2.98e-44	0.103
rs1832575	cg03955764	-0.12	-17.61	3.16e-44	0.125
rs11257392	cg21322043	0.3	17.61	3.33e-44	0.333
rs1106478	cg19572051	-0.2	-17.61	3.33e-44	0.196
rs9424166	cg11519256	0.02	17.61	3.36e-44	0.029
rs2495740	cg16342193	-0.07	-17.6	3.42e-44	0.071
rs6601958	cg13661397	-0.13	-17.6	3.5e-44	0.132
rs9423905	cg14623216	0.07	17.6	3.53e-44	0.075
rs1418738	cg14623216	0.07	17.6	3.53e-44	0.075
rs1418737	cg14623216	0.07	17.6	3.53e-44	0.075
rs9424182	cg14623216	0.07	17.6	3.53e-44	0.075
rs10887025	cg07444487	0.17	17.6	3.6e-44	0.178
rs10749436	cg07444487	0.17	17.6	3.6e-44	0.178
rs75474563	cg11519256	0.02	17.6	3.6e-44	0.028
rs7916904	cg07570687	0.12	17.59	3.83e-44	0.121
rs55896038	cg22633036	-0.15	-17.58	3.95e-44	0.148
rs7091556	cg22633036	-0.15	-17.58	3.95e-44	0.148
rs1334596	cg10751070	0.14	17.58	3.96e-44	0.152
rs1649045	cg12342675	-0.14	-17.58	4.1e-44	0.141
rs377007525	cg11124823	-0.07	-17.58	4.2e-44	0.072
rs201017788	cg11124823	-0.07	-17.58	4.2e-44	0.072
rs201640211	cg11124823	-0.07	-17.58	4.2e-44	0.072
rs201207646	cg11124823	-0.07	-17.56	4.63e-44	0.072
rs4948951	cg03955764	-0.12	-17.56	4.69e-44	0.124
rs4948656	cg03955764	-0.12	-17.56	4.69e-44	0.124
rs12415640	cg03955764	-0.12	-17.56	4.69e-44	0.124
rs7083111	cg20848186	0.1	17.56	4.73e-44	0.117
rs284624	cg25172127	0.12	17.56	4.82e-44	0.132
rs284622	cg25172127	0.12	17.56	4.82e-44	0.132
rs7918409	cg07044115	0.22	17.56	4.85e-44	0.232
rs2495739	cg16342193	-0.07	-17.55	5.25e-44	0.071
rs7902034	cg23656959	0.1	17.55	5.25e-44	0.103
rs2789675	cg11124823	-0.07	-17.54	5.41e-44	0.072
rs117261594	cg11124823	-0.07	-17.53	5.74e-44	0.071
rs201371884	cg11124823	-0.07	-17.53	5.74e-44	0.071
rs1901640	cg21641816	-0.08	-17.52	6.18e-44	0.087
rs898372	cg25172127	0.12	17.52	6.28e-44	0.133
rs2489040	cg16342193	-0.07	-17.52	6.52e-44	0.072
rs12258145	cg02947450	-0.11	-17.51	6.62e-44	0.143
rs2800397	cg14240646	0.24	17.51	6.73e-44	0.22
rs2780673	cg14240646	0.24	17.51	6.73e-44	0.22
rs10900170	cg03955764	-0.12	-17.51	6.81e-44	0.124
rs1549798	cg23339629	0.08	17.51	6.87e-44	0.072
rs1549800	cg23339629	0.08	17.51	6.87e-44	0.072
rs1549801	cg23339629	0.08	17.51	6.87e-44	0.072
rs4748019	cg14458563	0.16	17.51	7.1e-44	0.157
rs76394459	cg11519256	0.02	17.51	7.1e-44	0.029
rs10883513	cg16342193	-0.07	-17.5	7.39e-44	0.071
rs2251968	cg25172127	0.12	17.49	7.67e-44	0.131
rs10491016	cg07899896	0.18	17.49	7.68e-44	0.201
rs2474530	cg18937502	-0.08	-17.49	7.7e-44	0.091
rs11010192	cg18937502	-0.08	-17.49	7.7e-44	0.091
[truncated: 496,263+ more rows]
